# Supplementary material for: The perfluoroalkylthiolation/decarbonylation reaction of 1,3-diketones with perfluoroalkanesulfenic acids
Source: Royal Society of Chemistry journal article supplement (doi:10.1039/d3ob01482g), 2023-01-01

**Supporting Information**

**The Perfluoroalkylthiolation/decarbonylation Reaction  
of 1,3-Diketones with Perfluoroalkanesulfenic Acids**

*Jia-Hui Li,<sup>[a,b]</sup> Min Jiang<sup>[b]</sup> and Jin-Tao Liu\*<sup>[a,b]</sup>*

*[a] J.-H. Li, Prof. Dr. J.-T. Liu\* The Education Ministry Key Lab of Resource Chemistry and Shanghai Key Laboratory of Rare Earth Functional Materials, Shanghai Normal University, Shanghai 200234, China*

*[b] Dr. M. Jiang, Prof. Dr. J.-T. Liu\* Key Laboratory of Organofluorine Chemistry, Shanghai Institute of Organic Chemistry, Chinese Academy of Science, 345 Lingling Road, Shanghai 200032, China.*

[jtliu@sioc.ac.cn](mailto:jtliu@sioc.ac.cn)

# Spectra

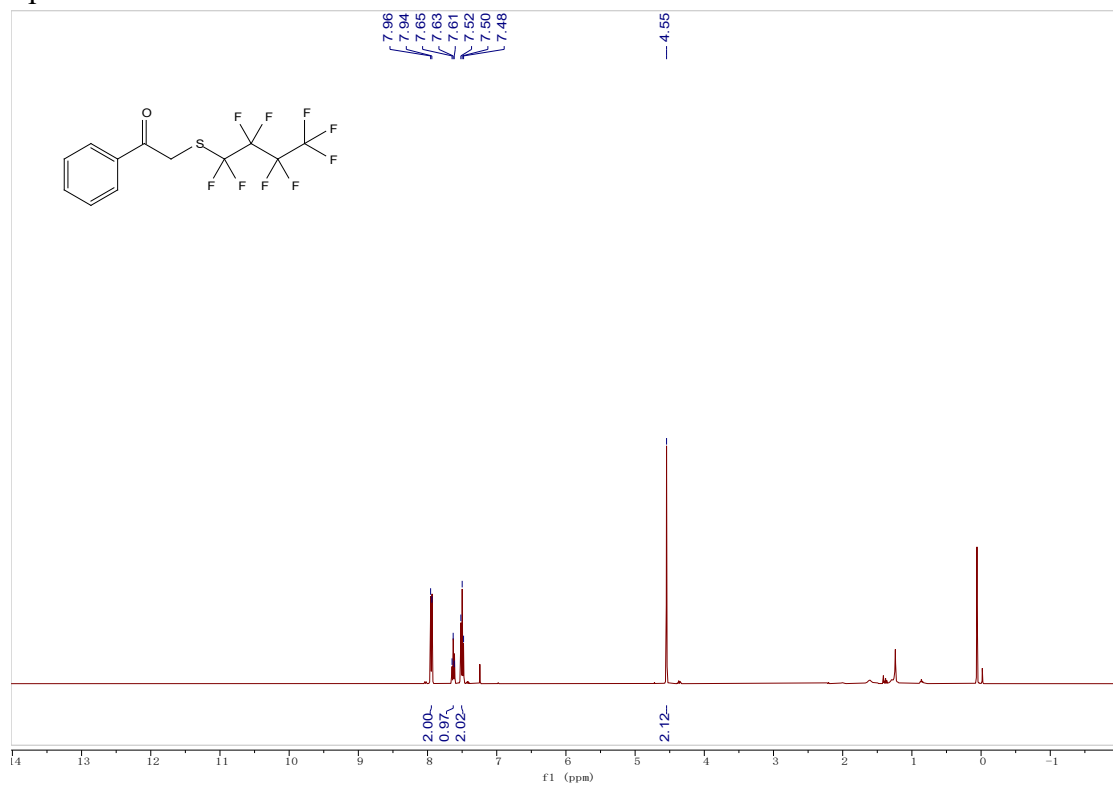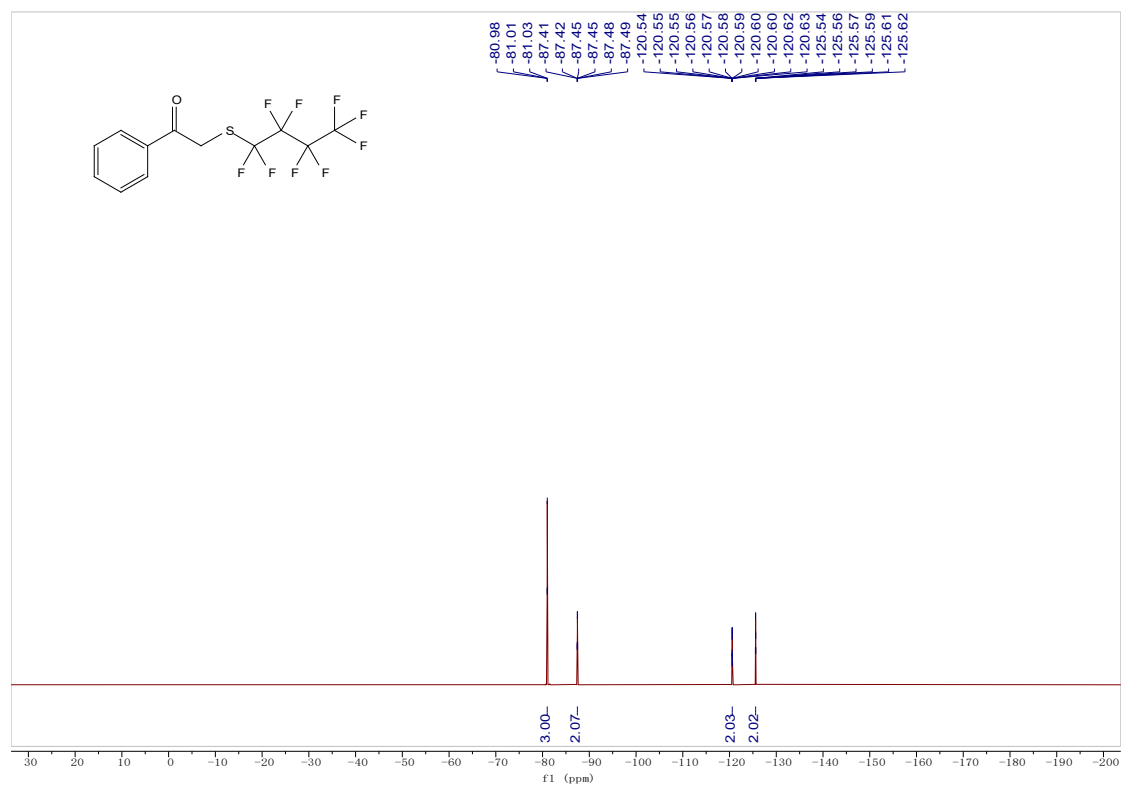

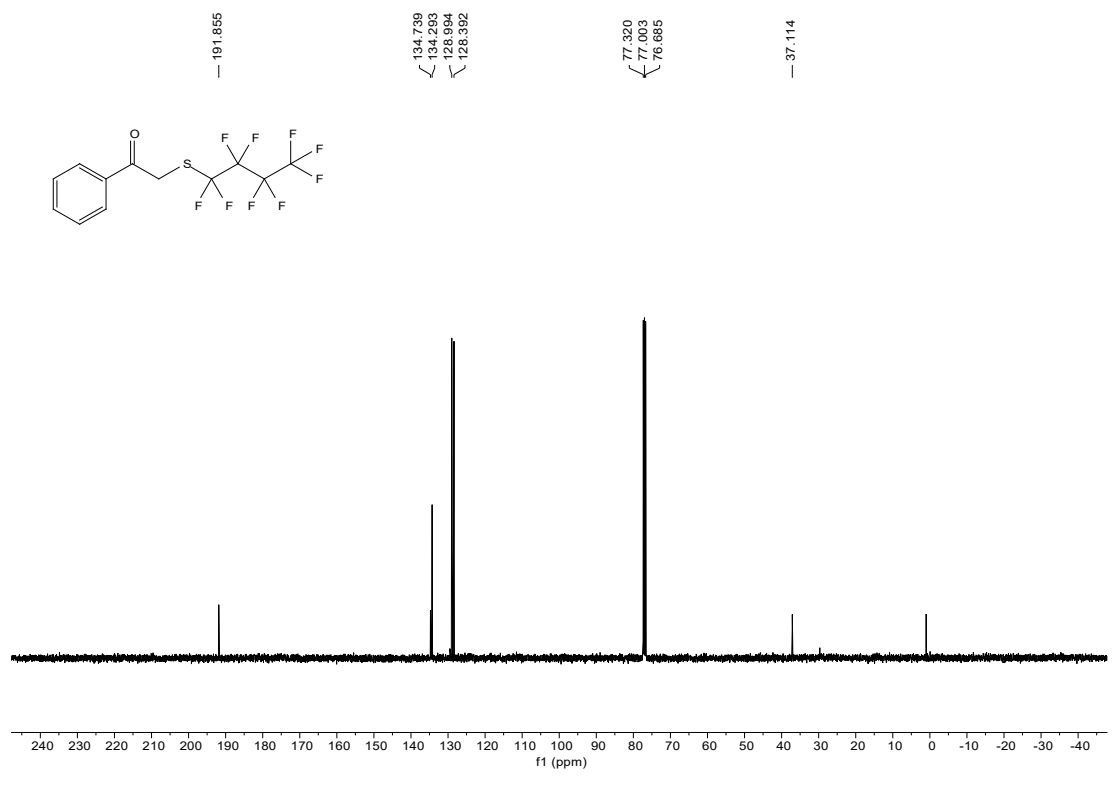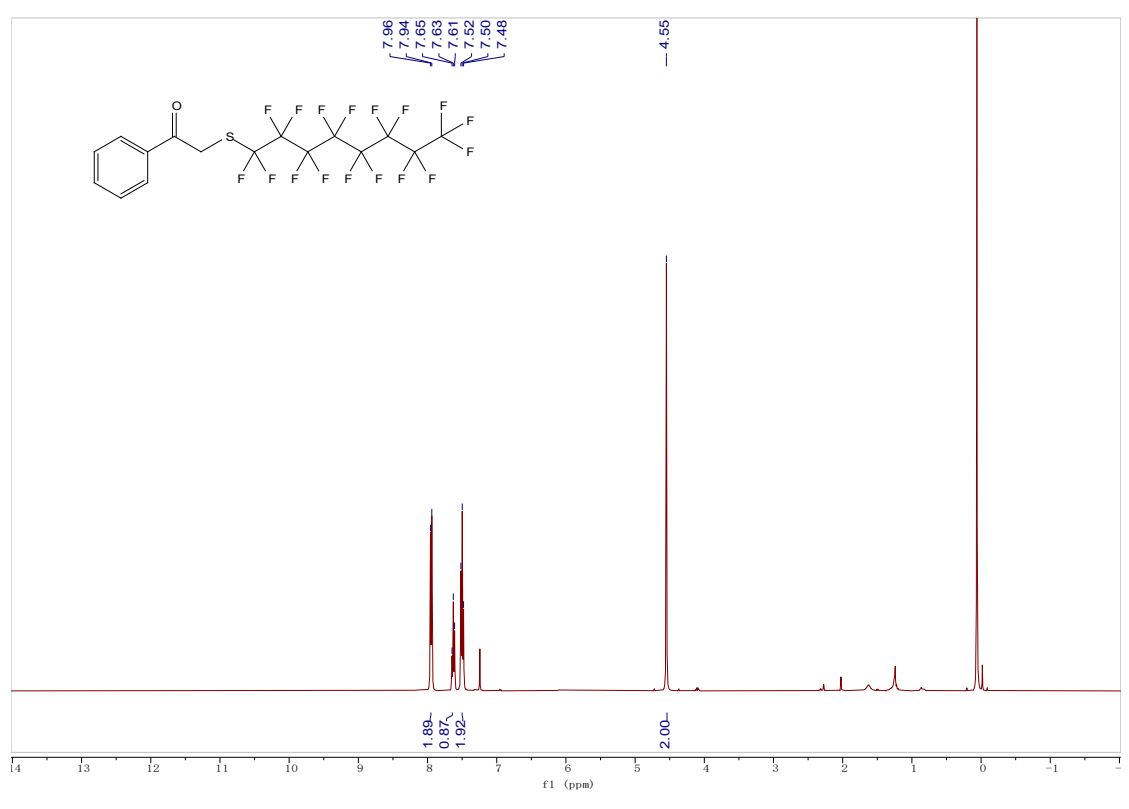

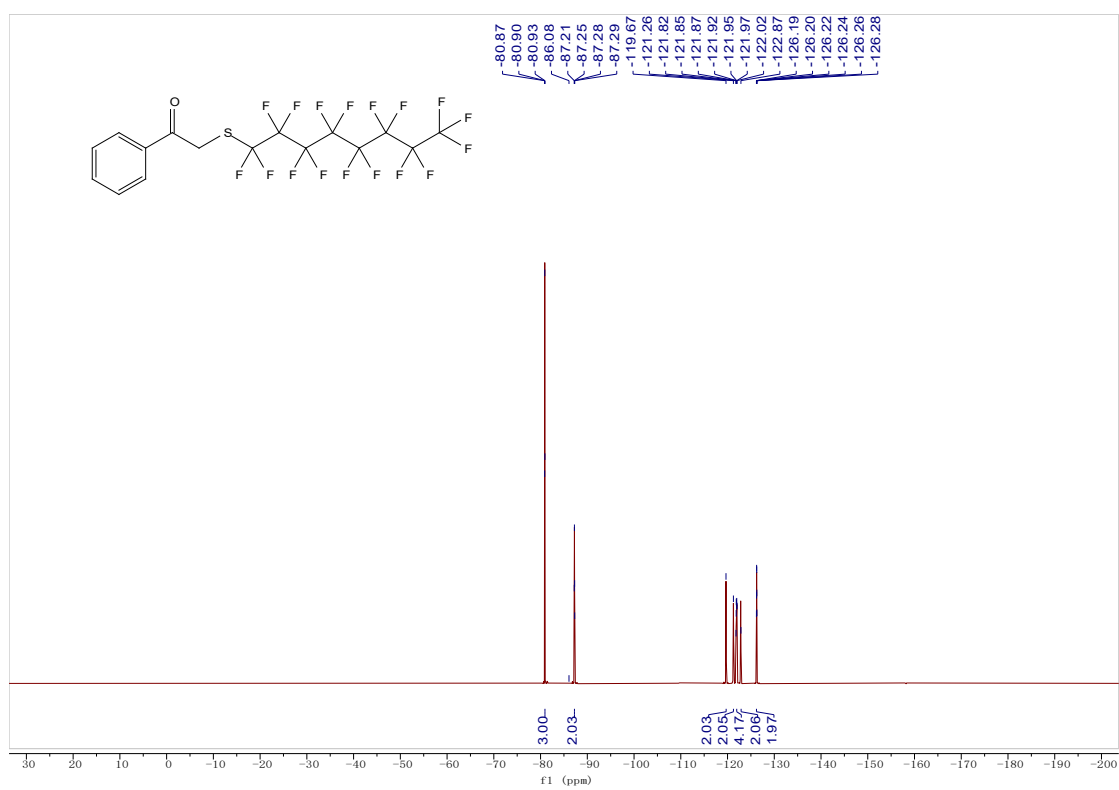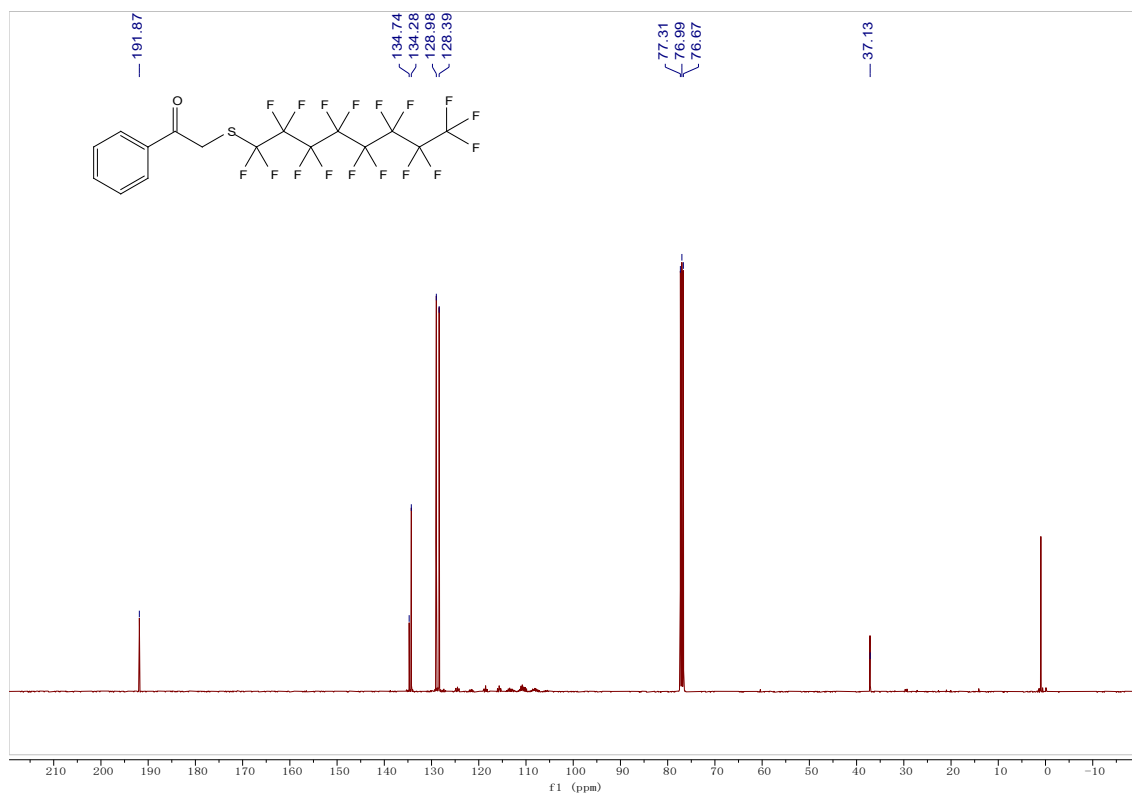

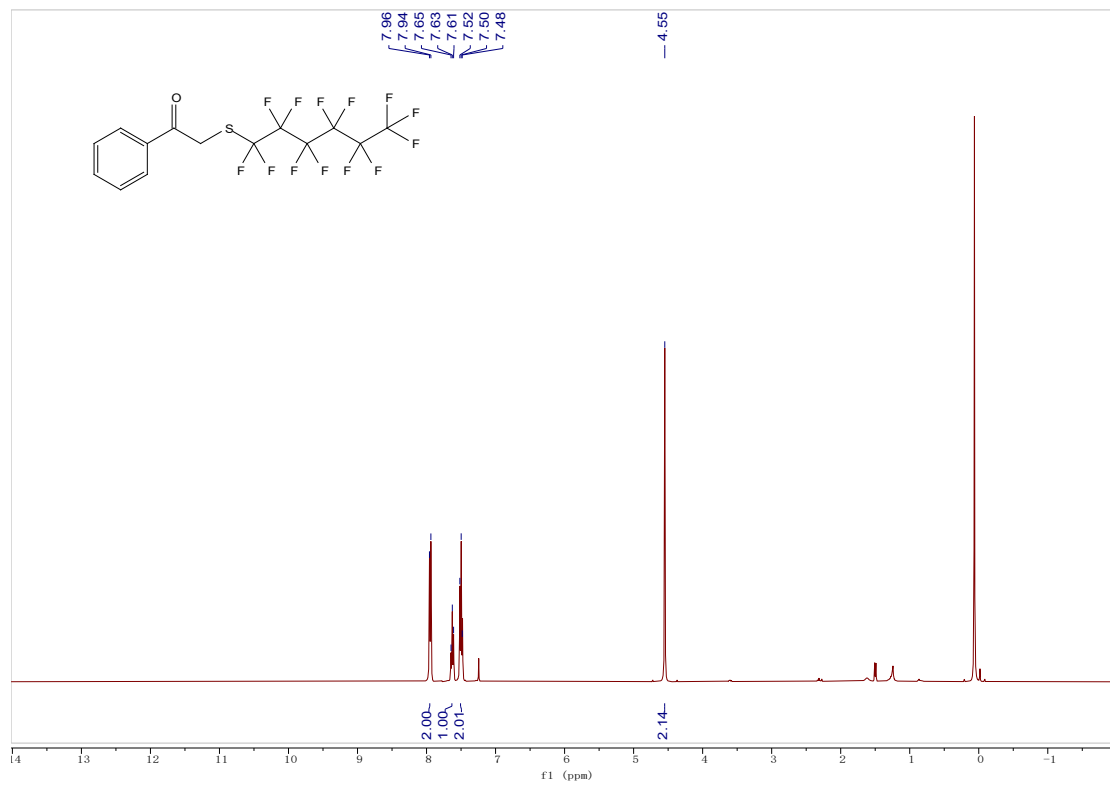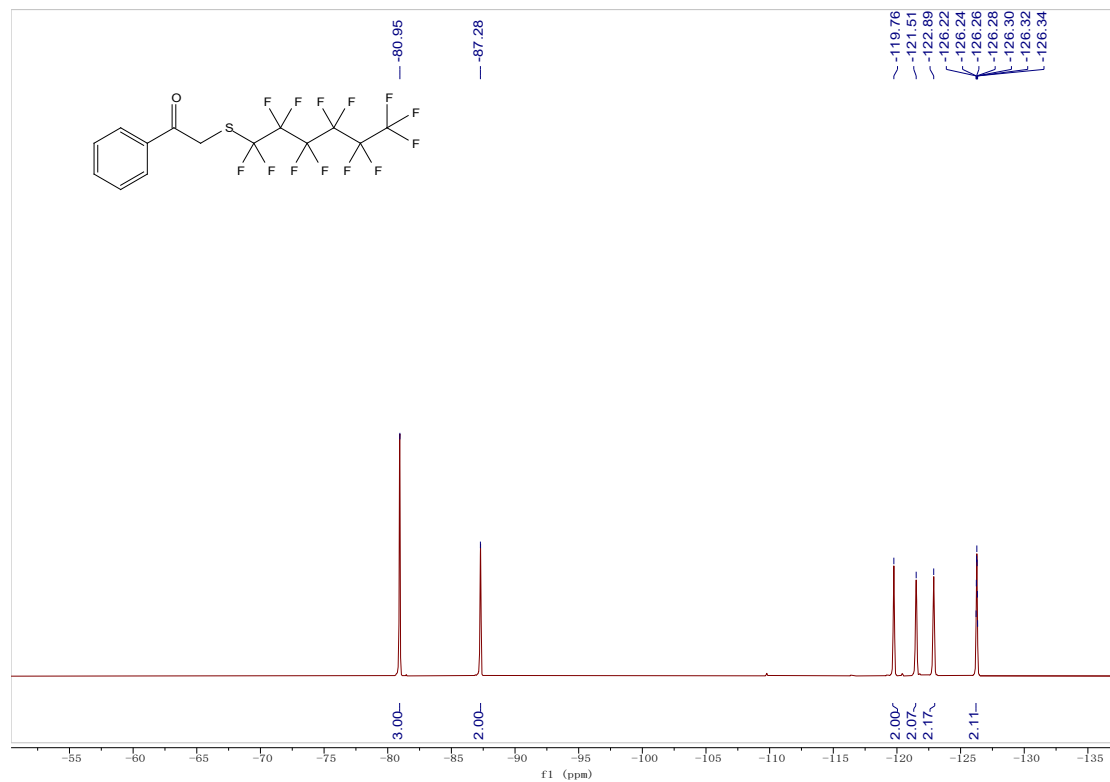

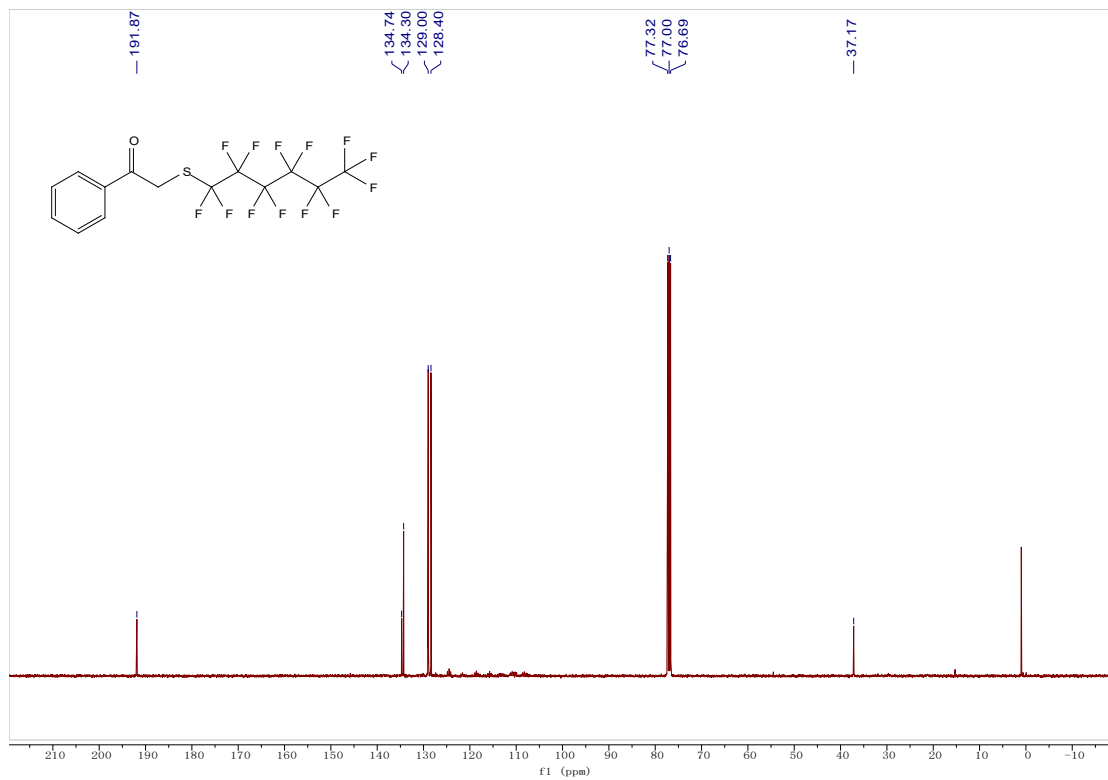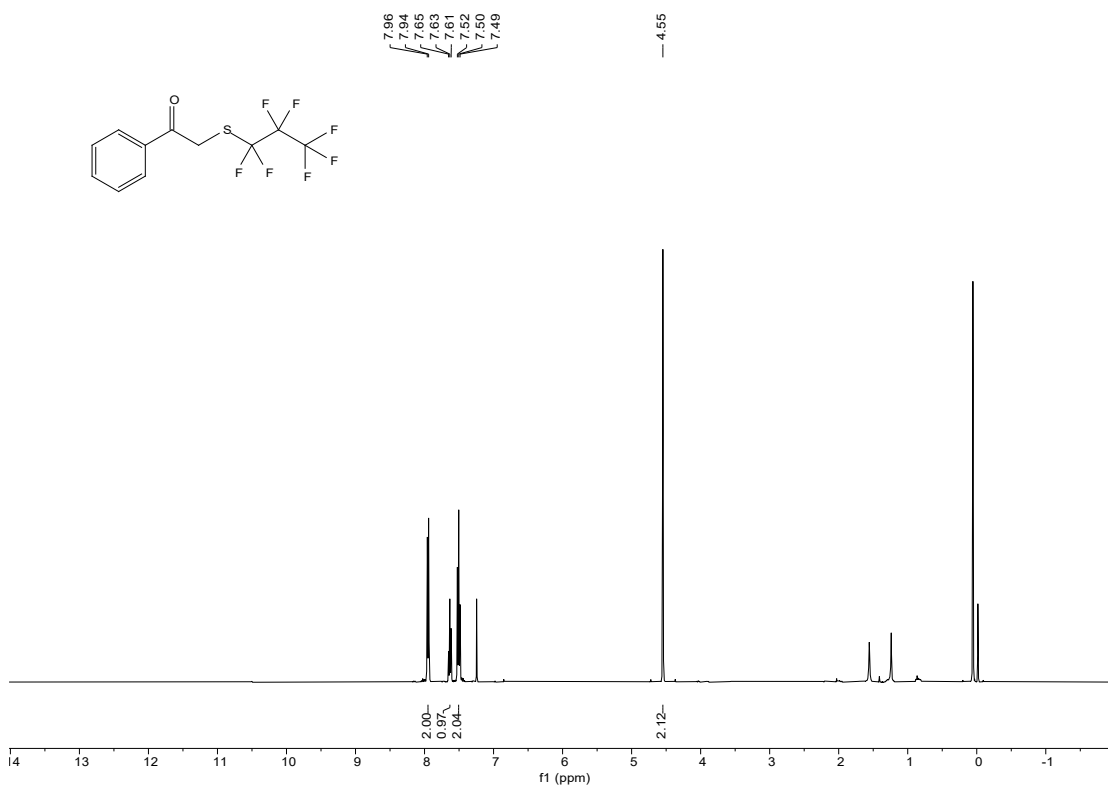

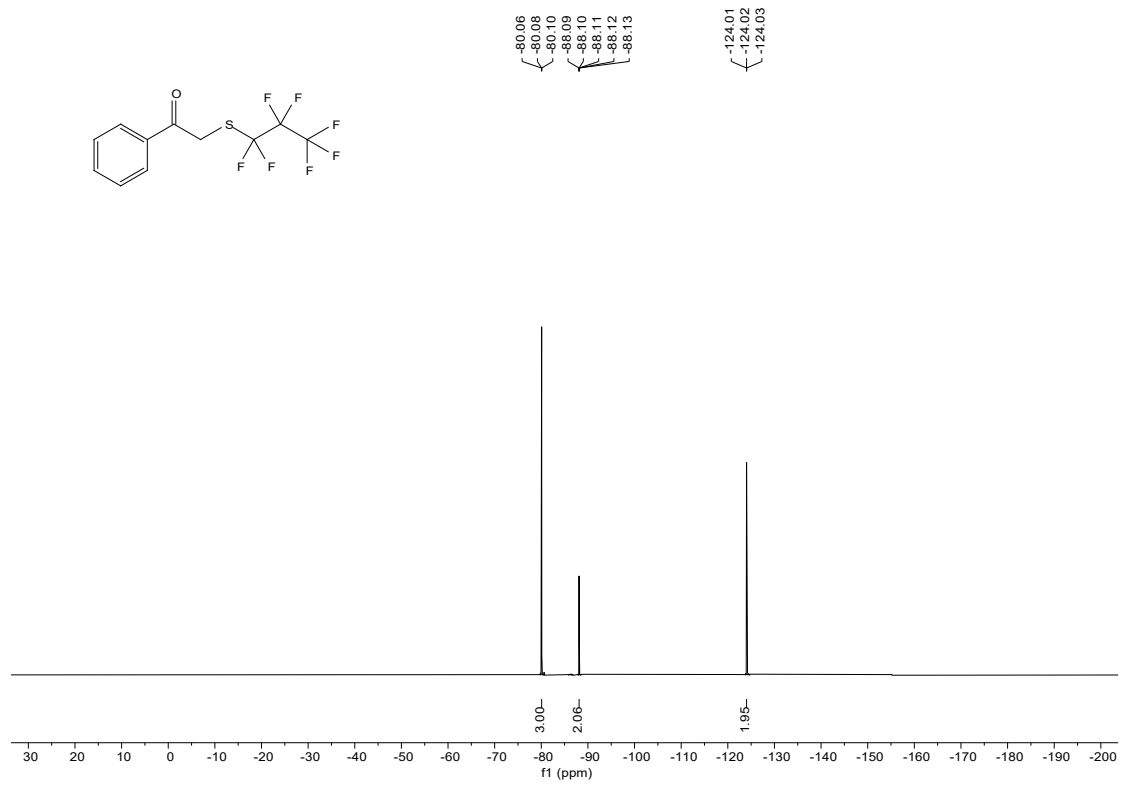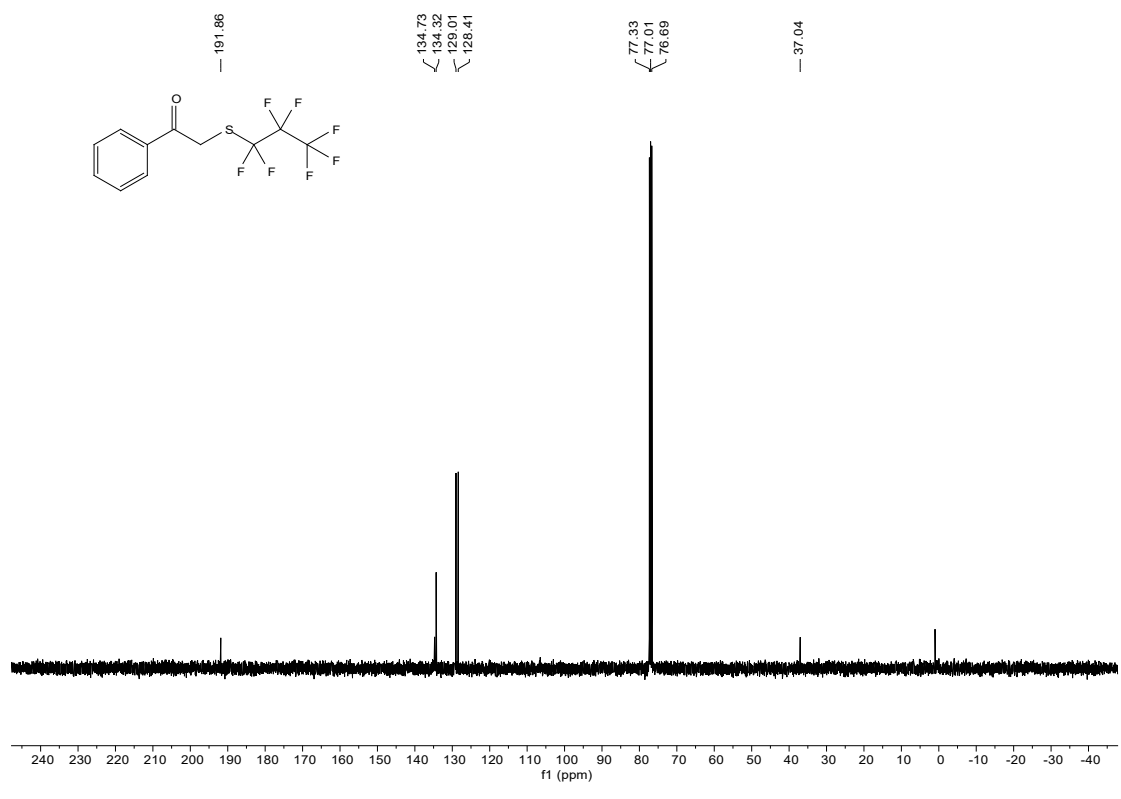

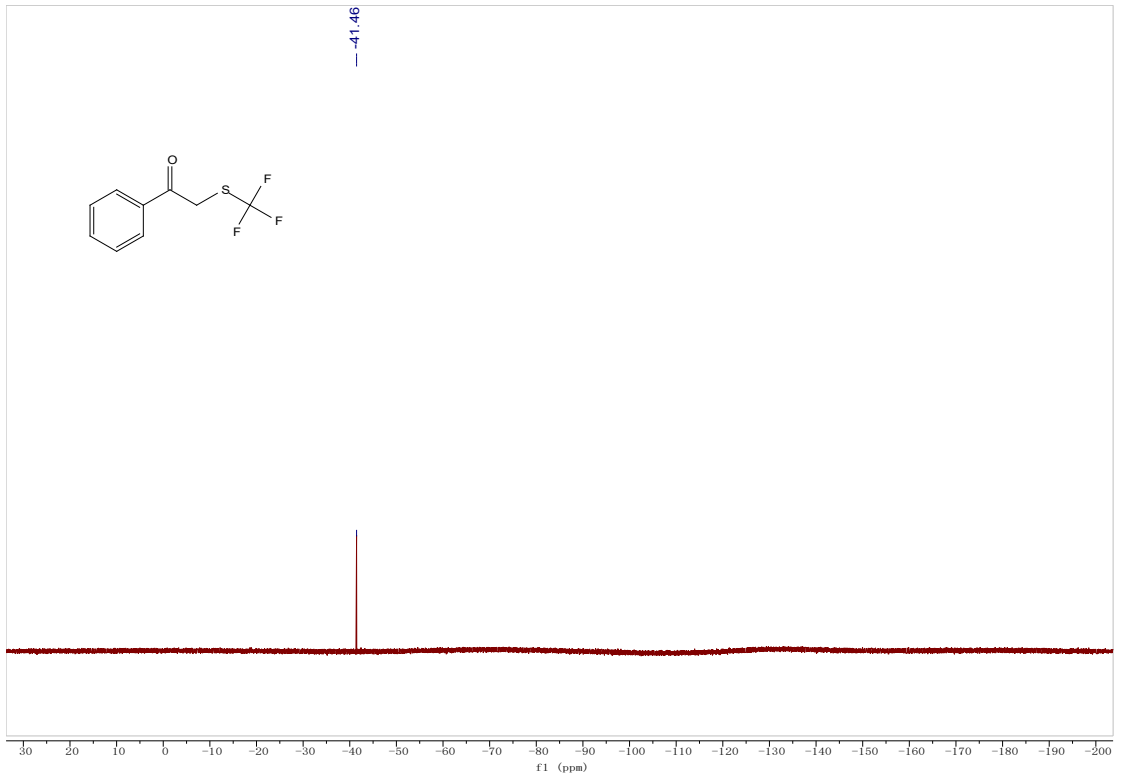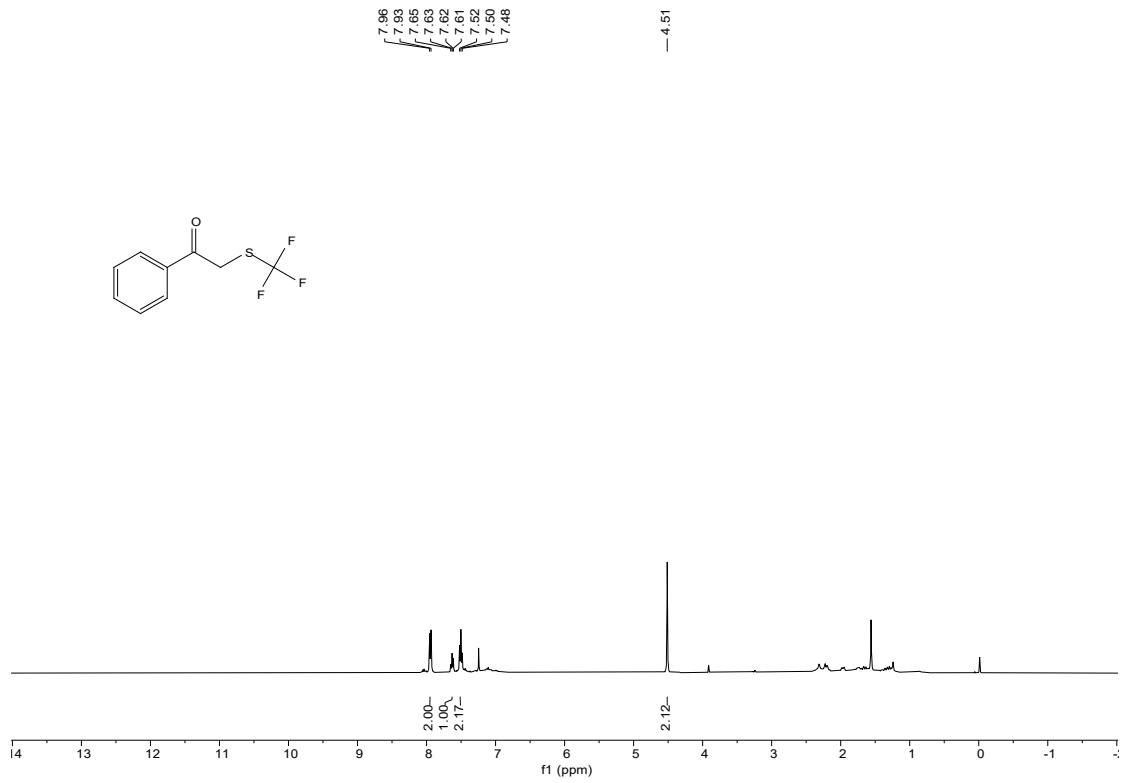



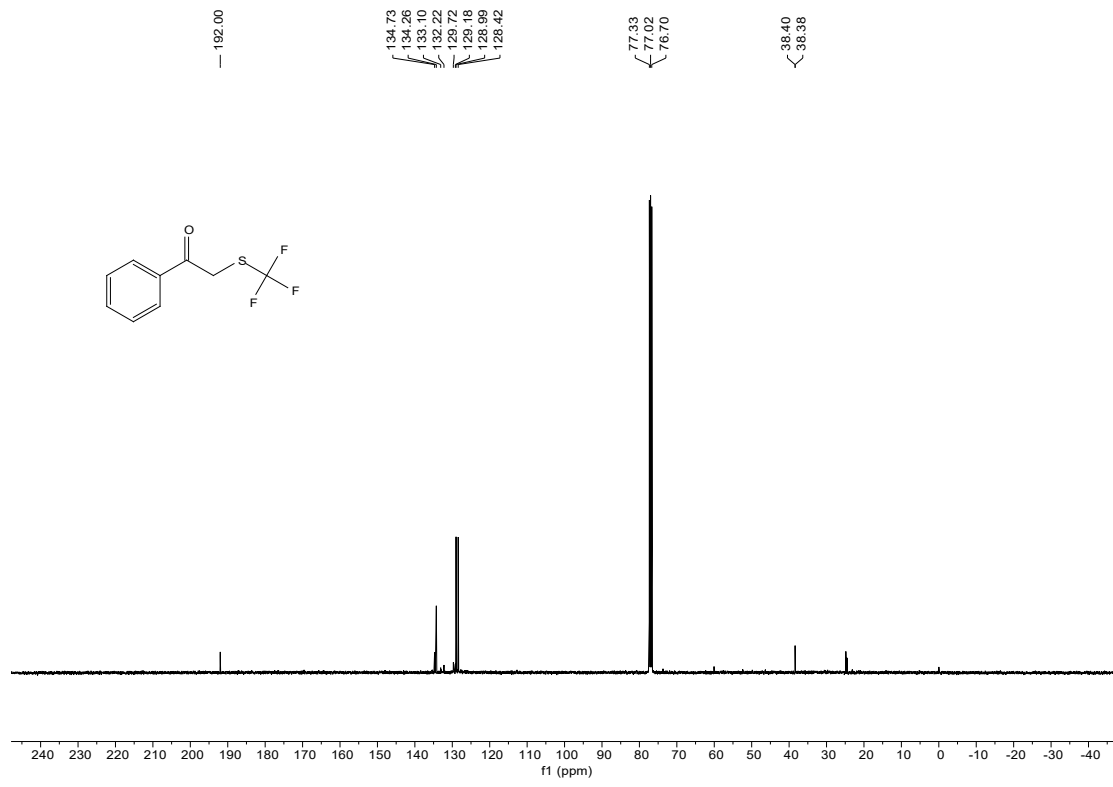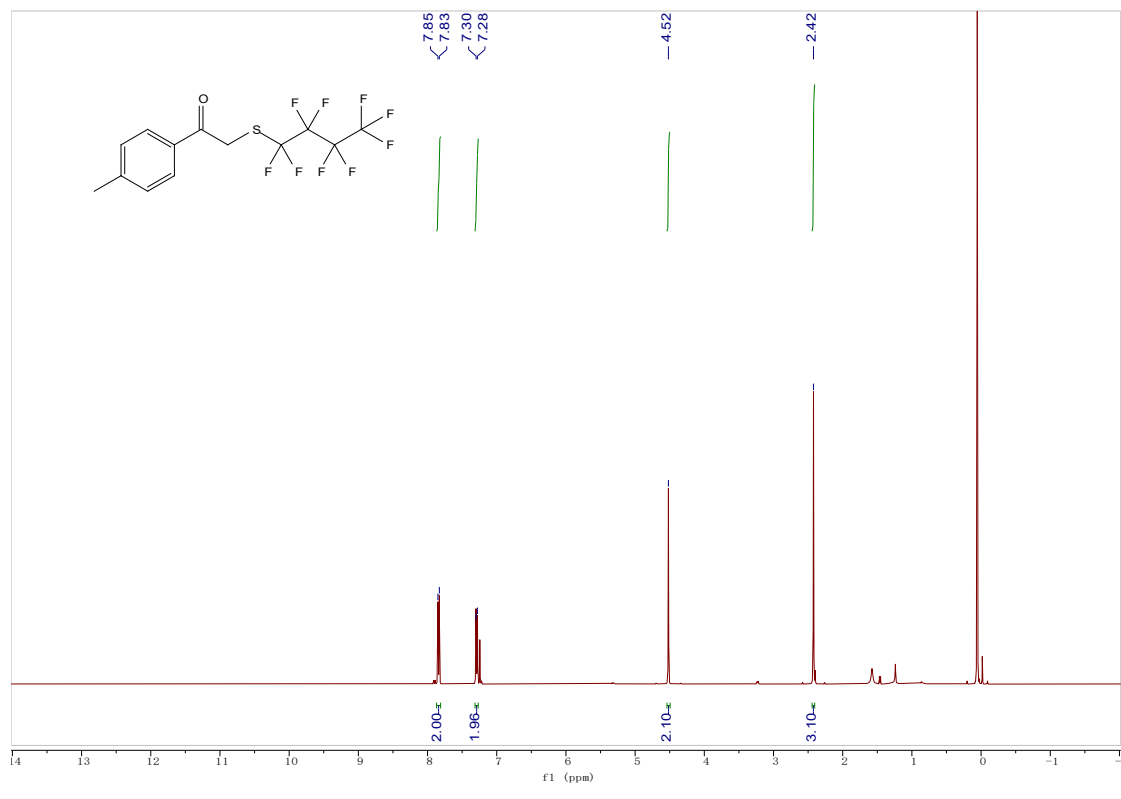

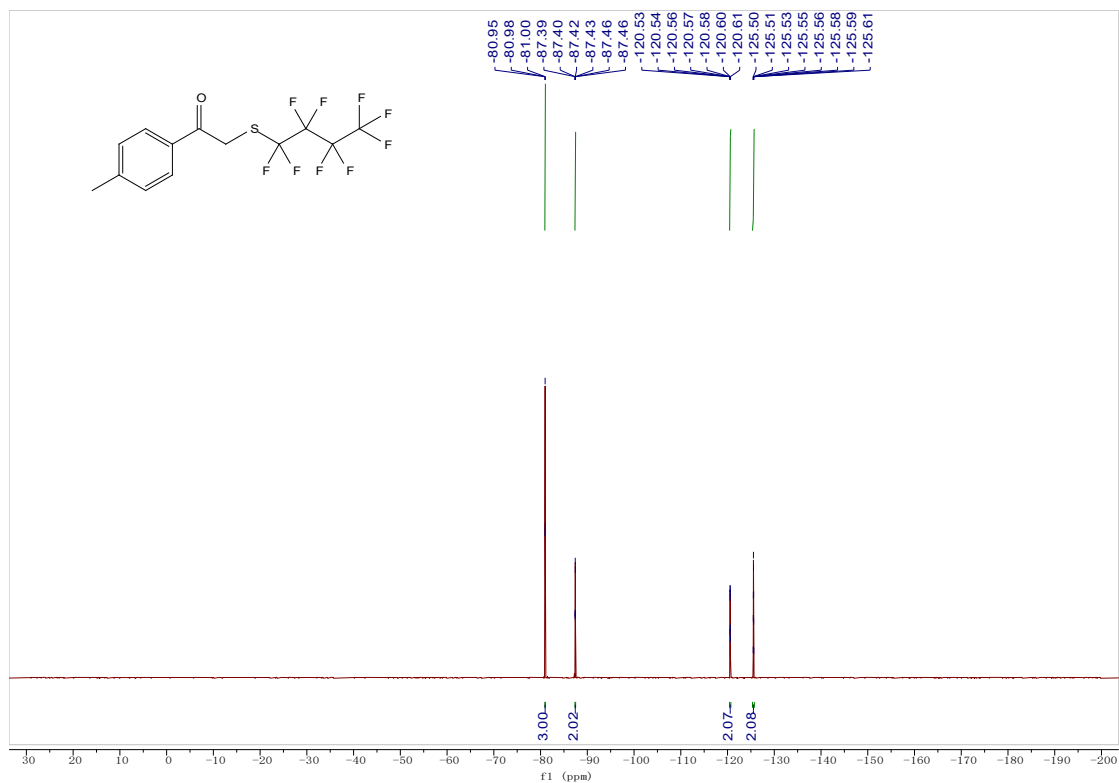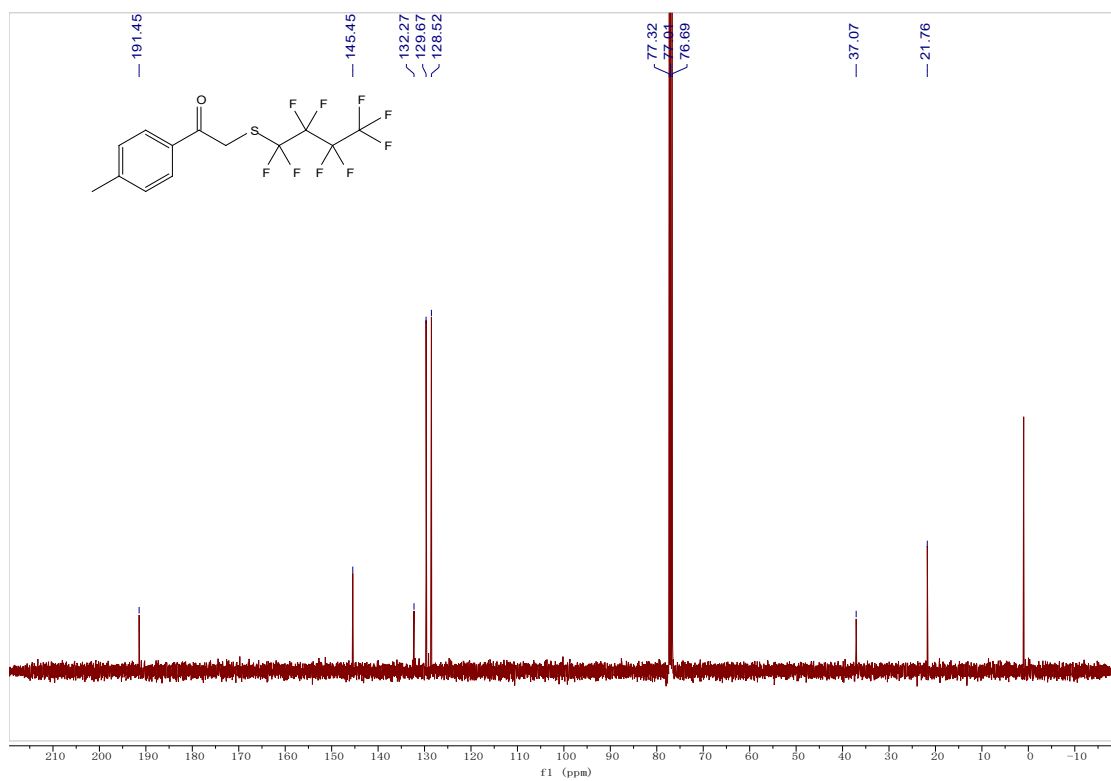

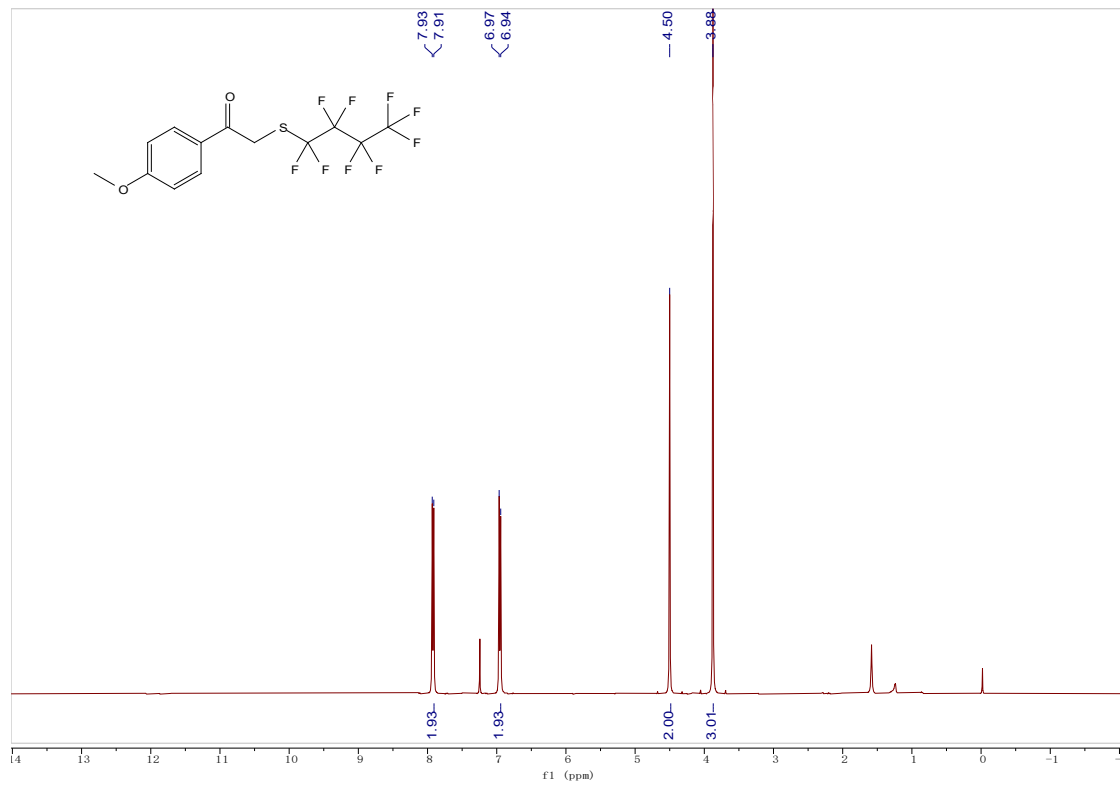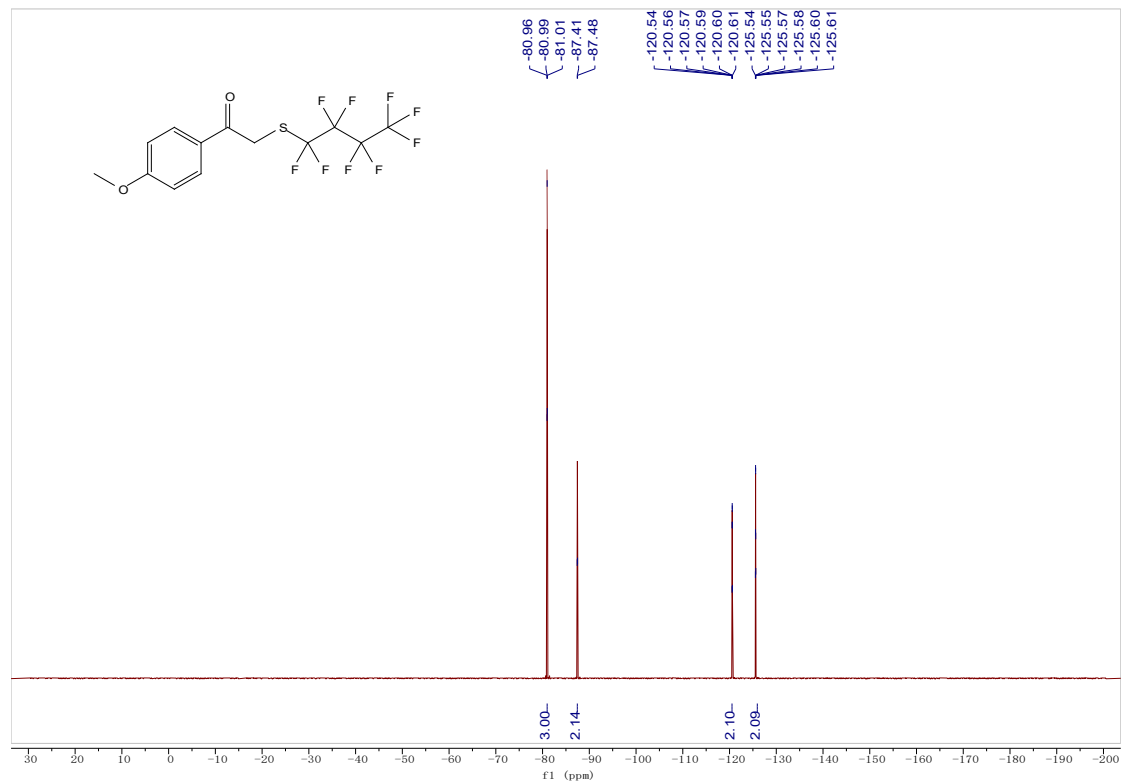

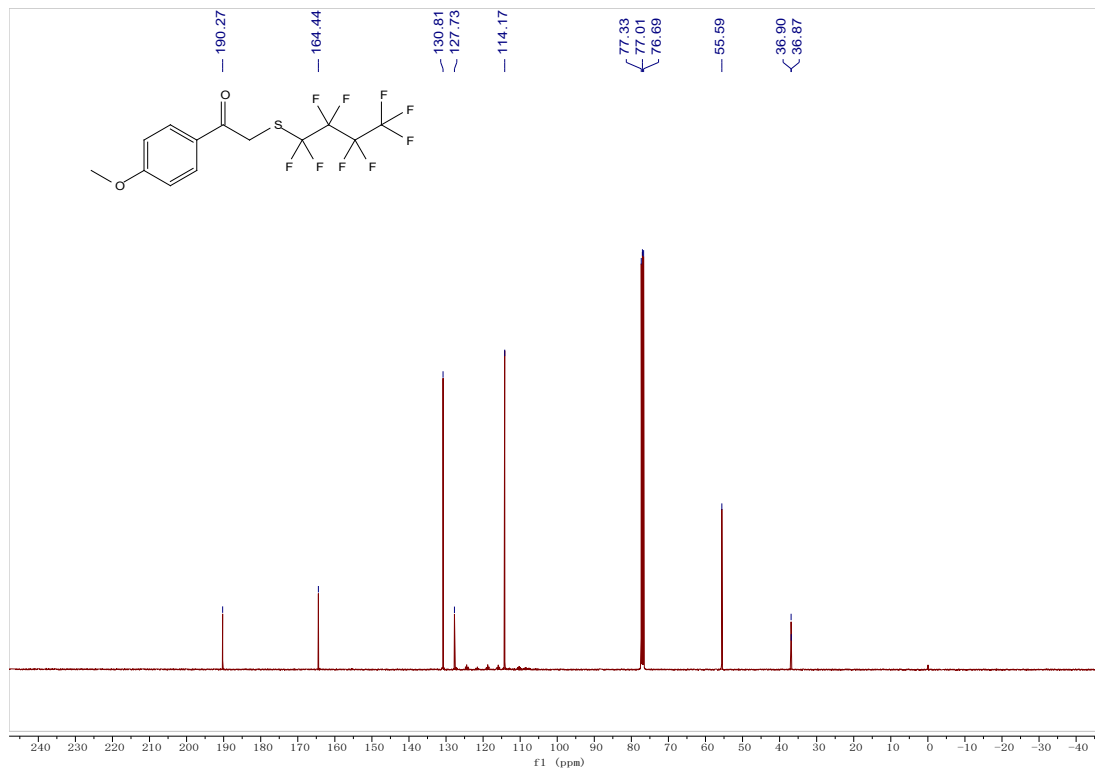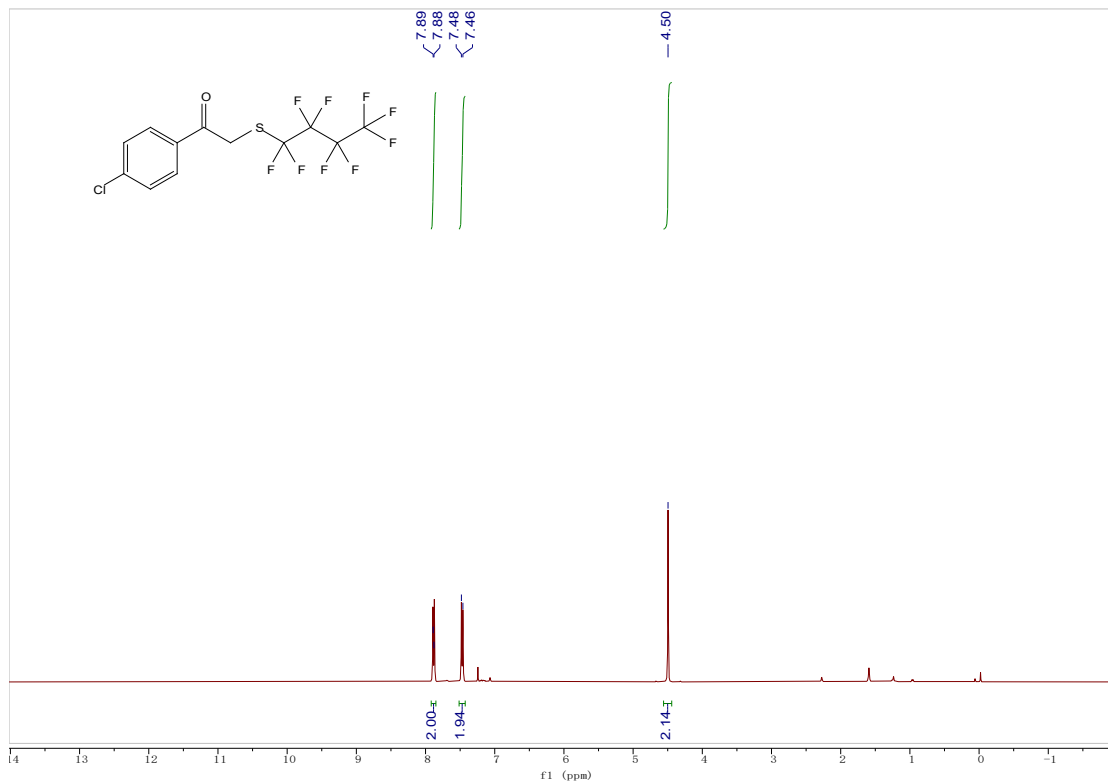

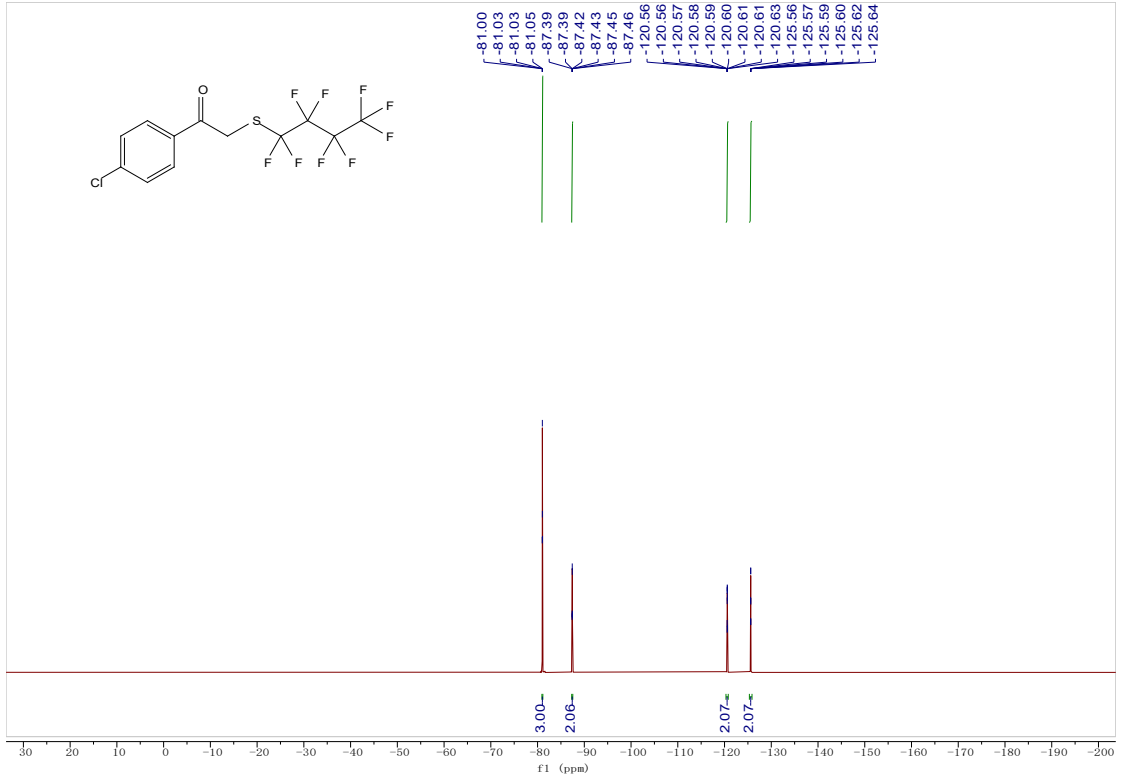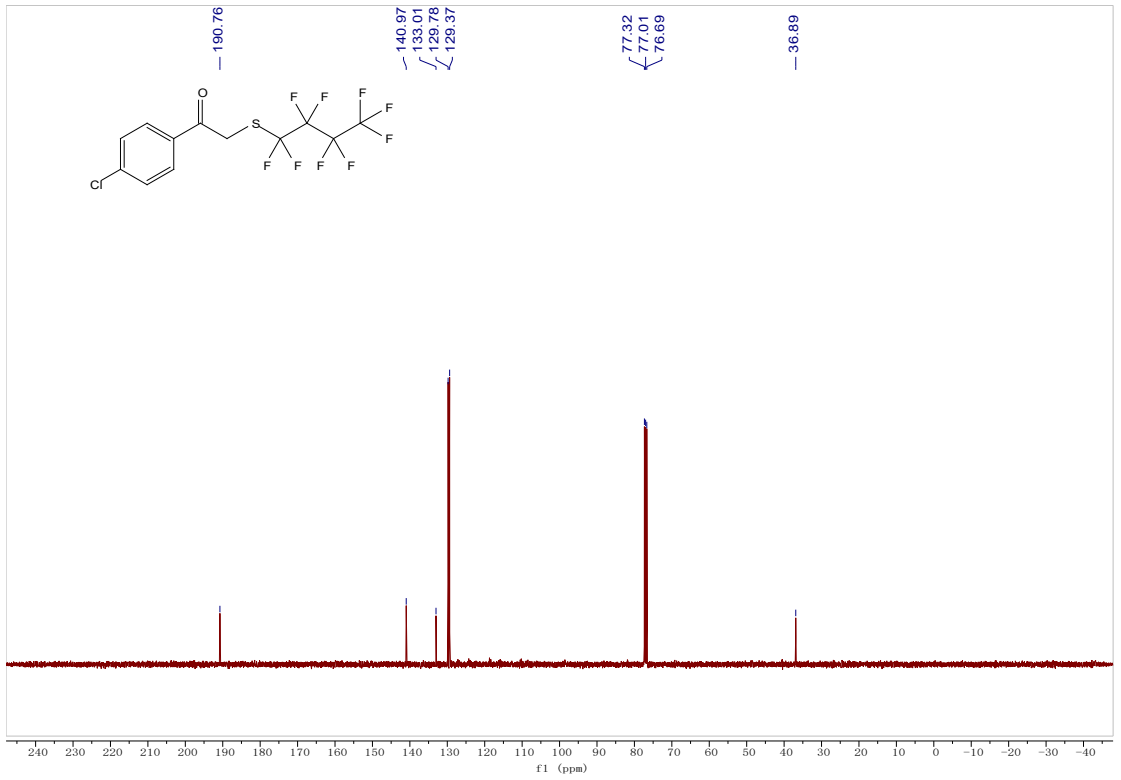

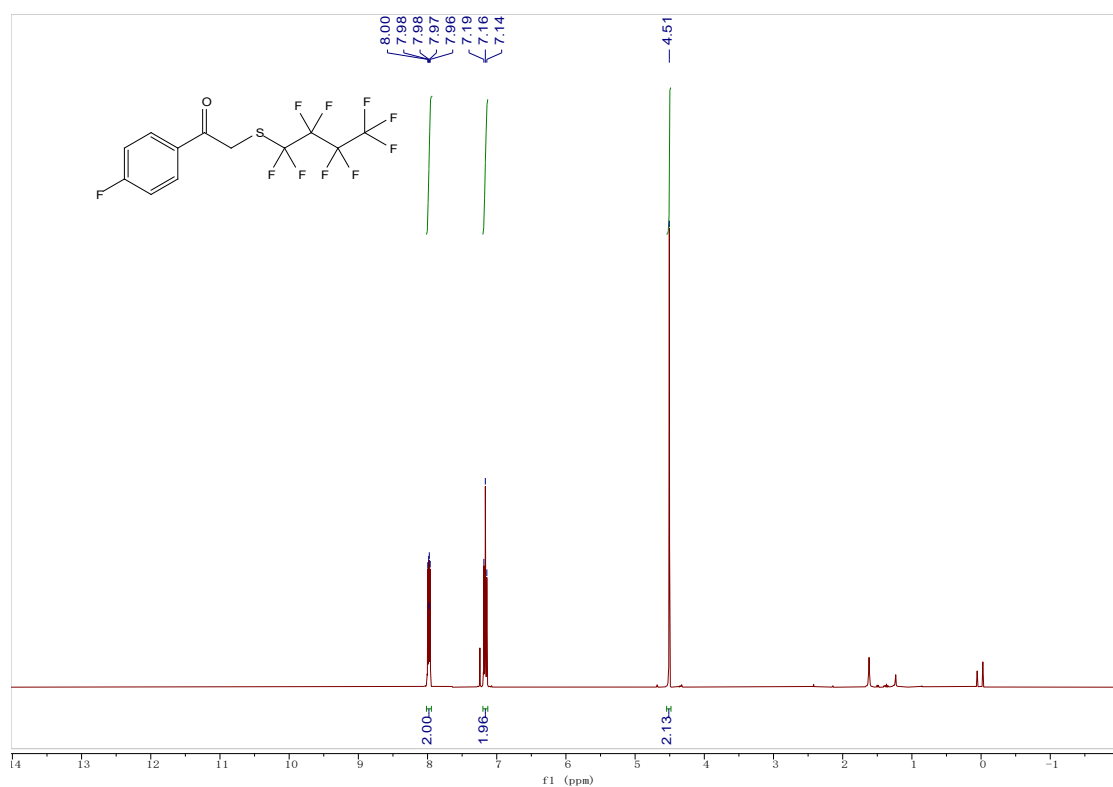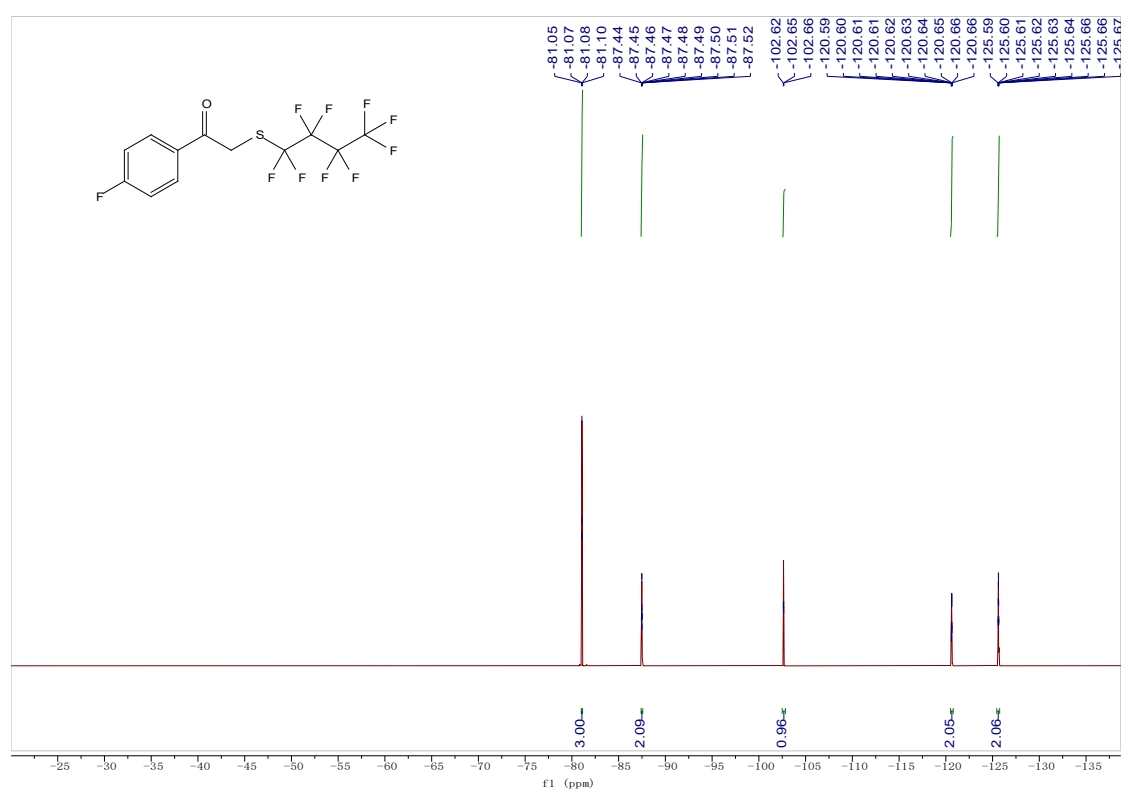

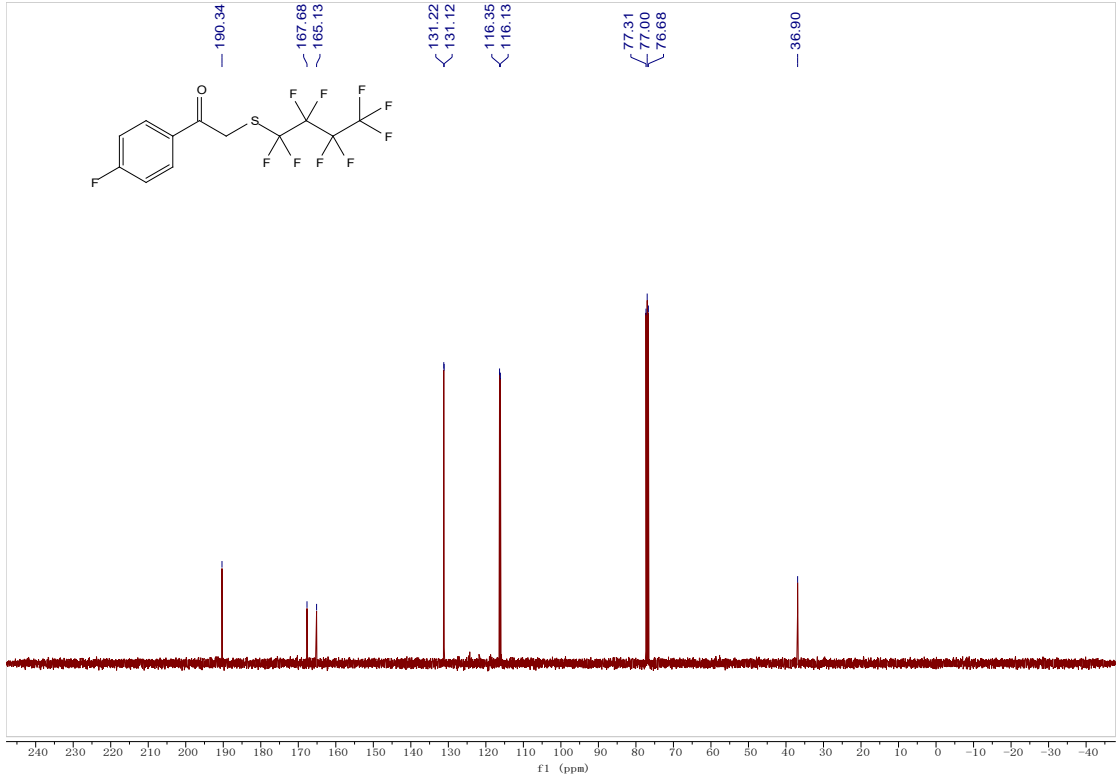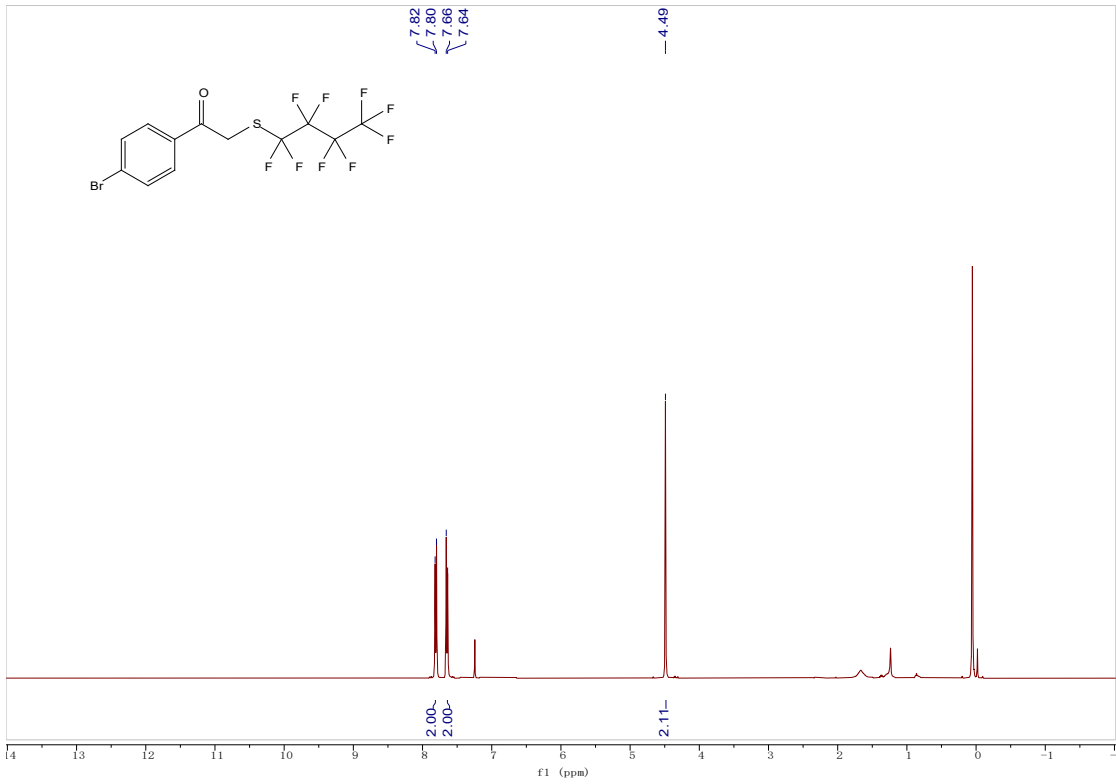

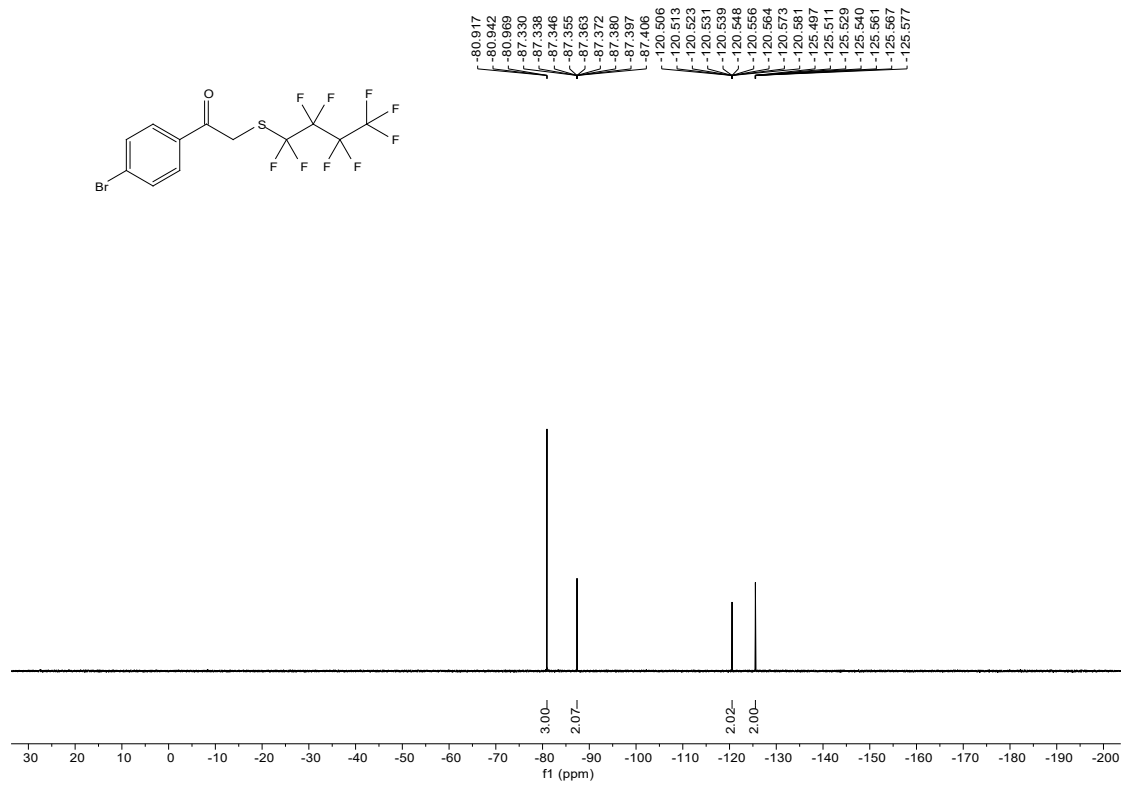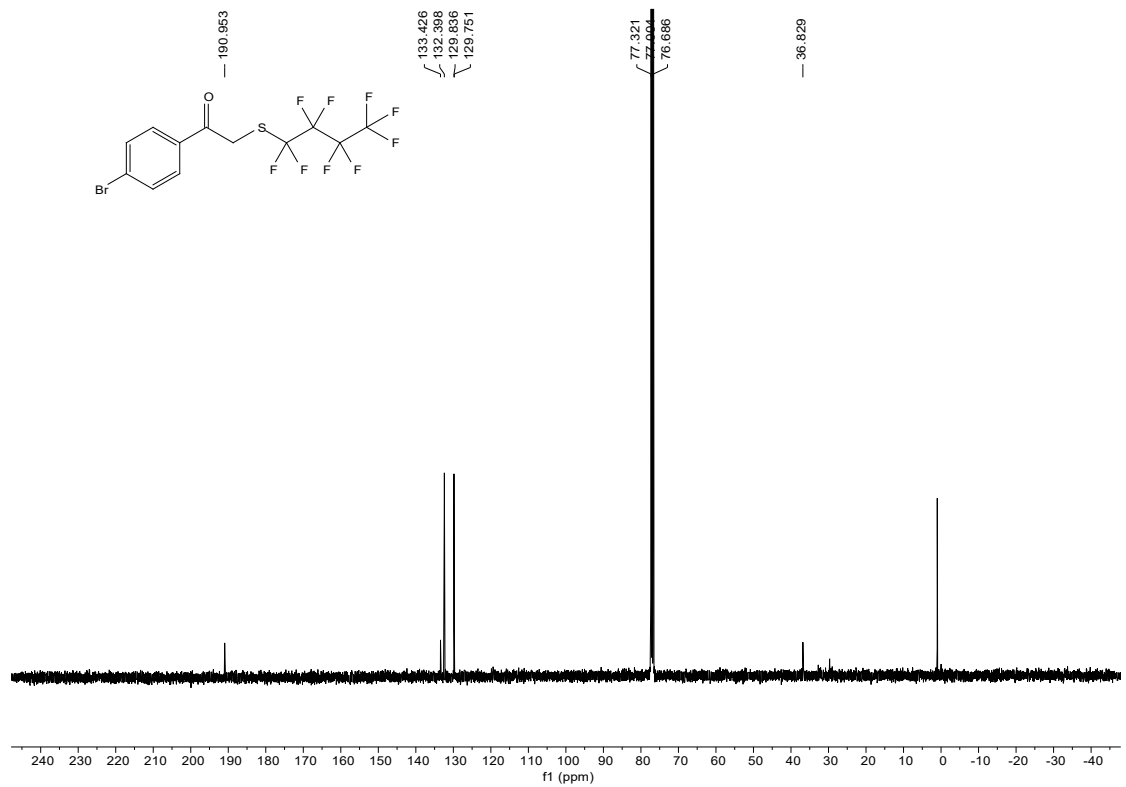



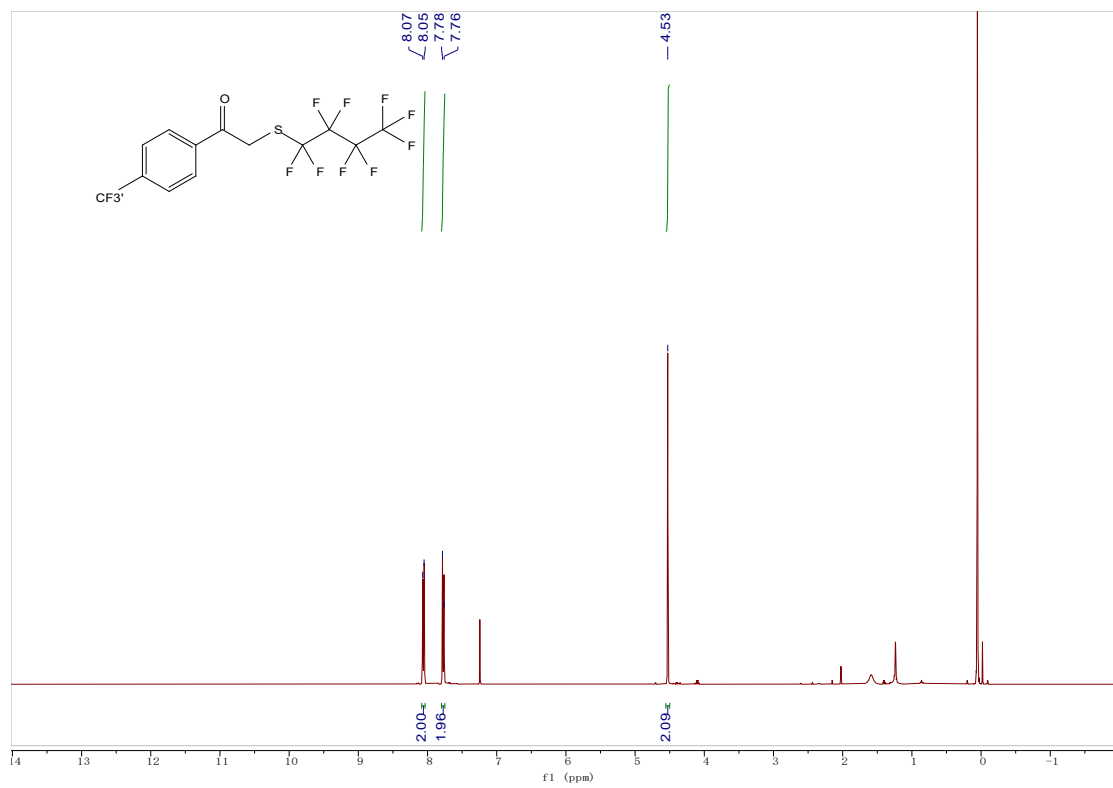

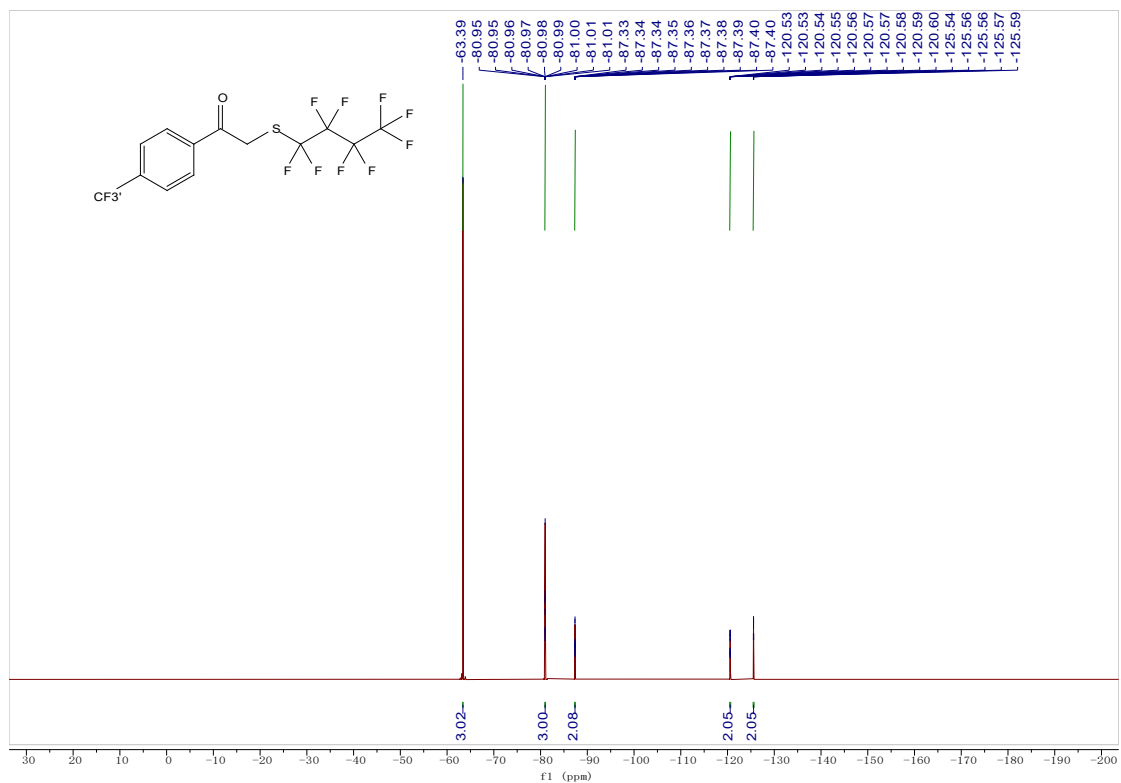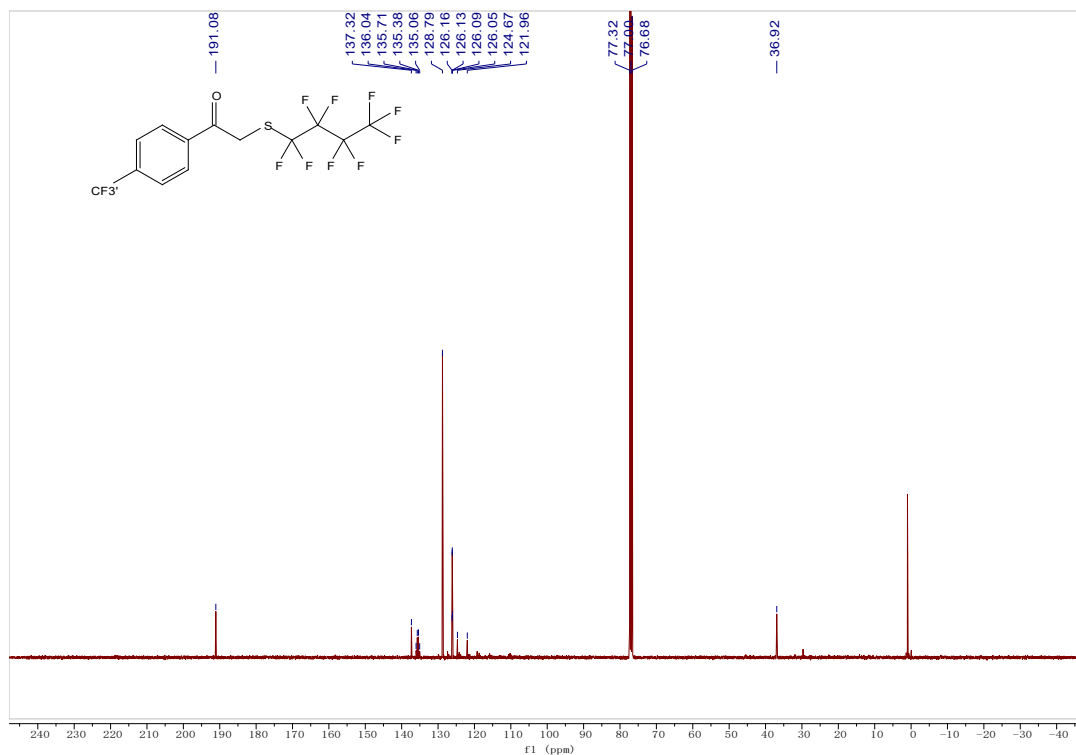

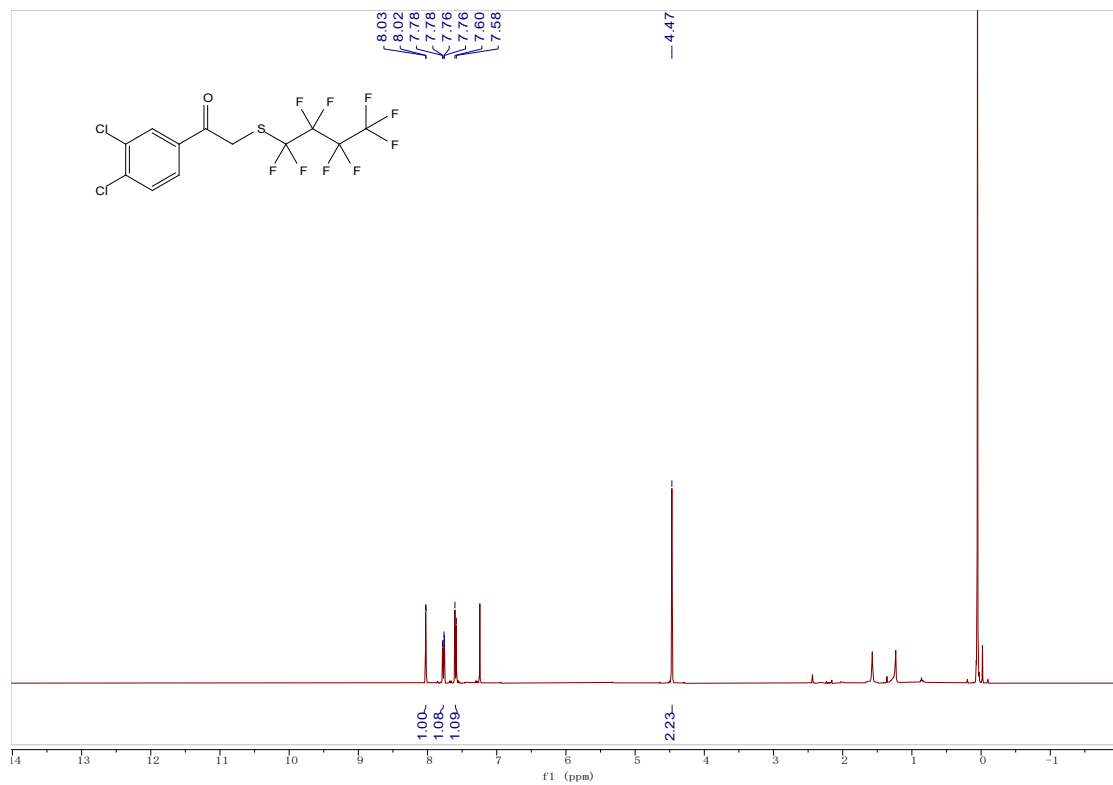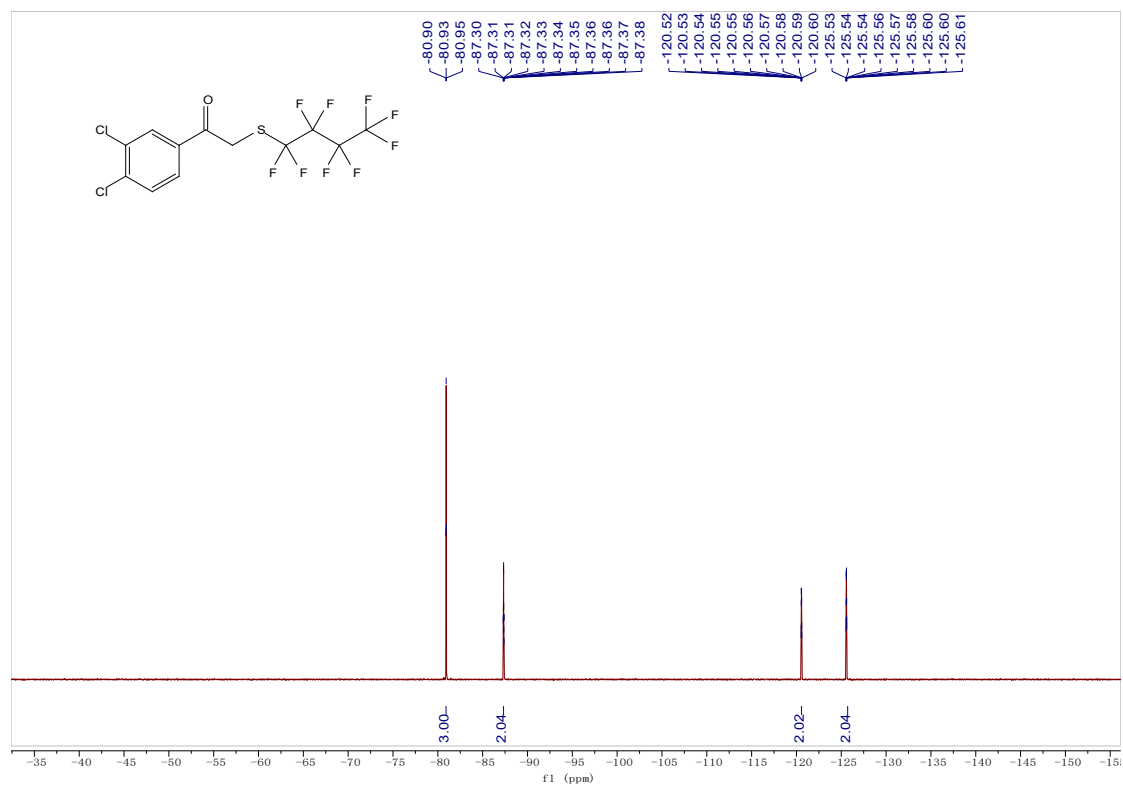

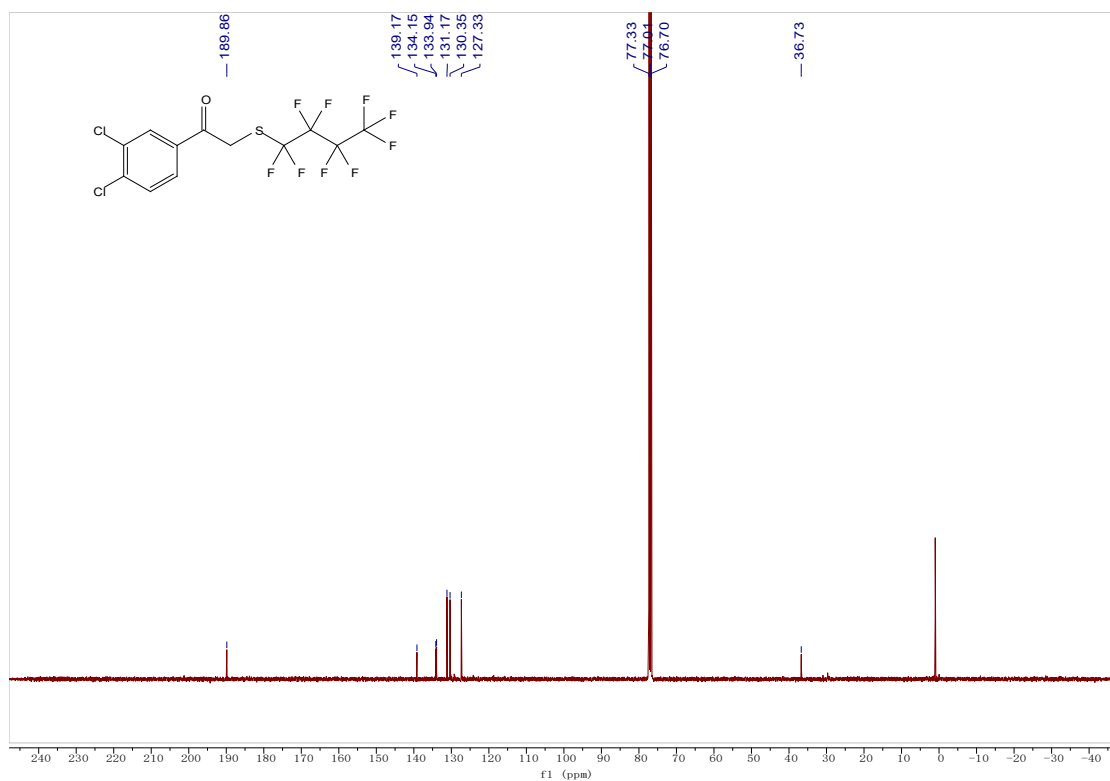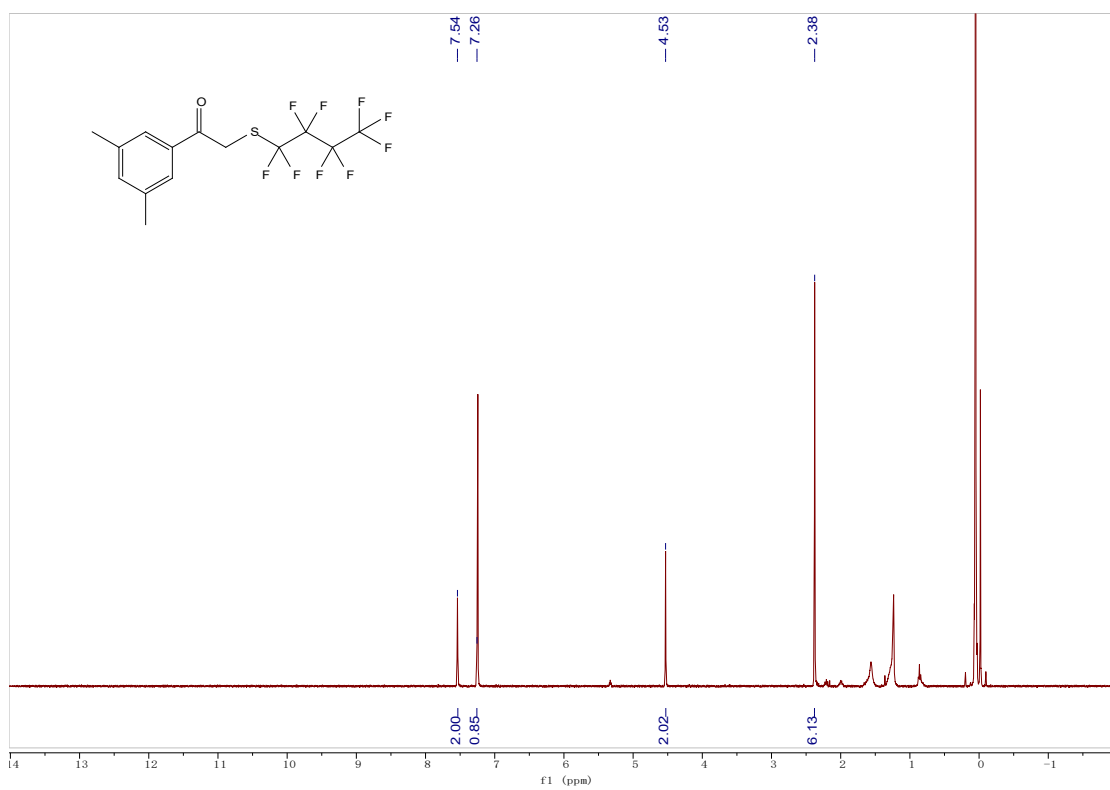

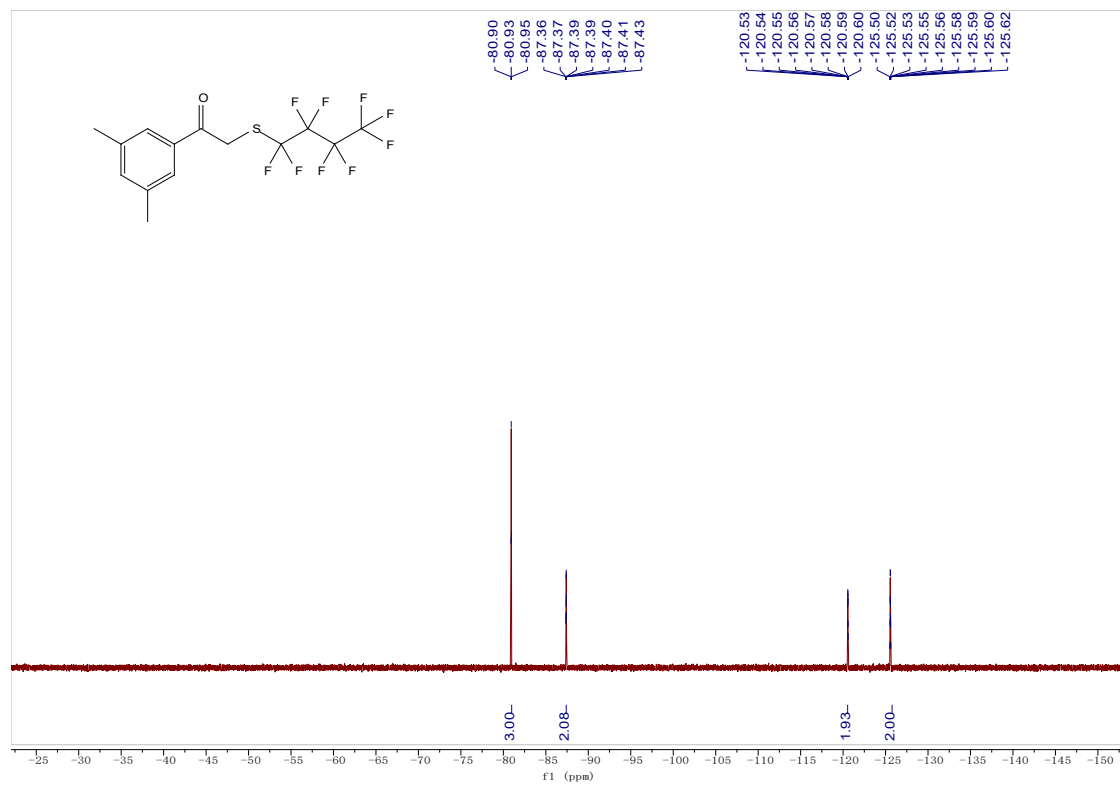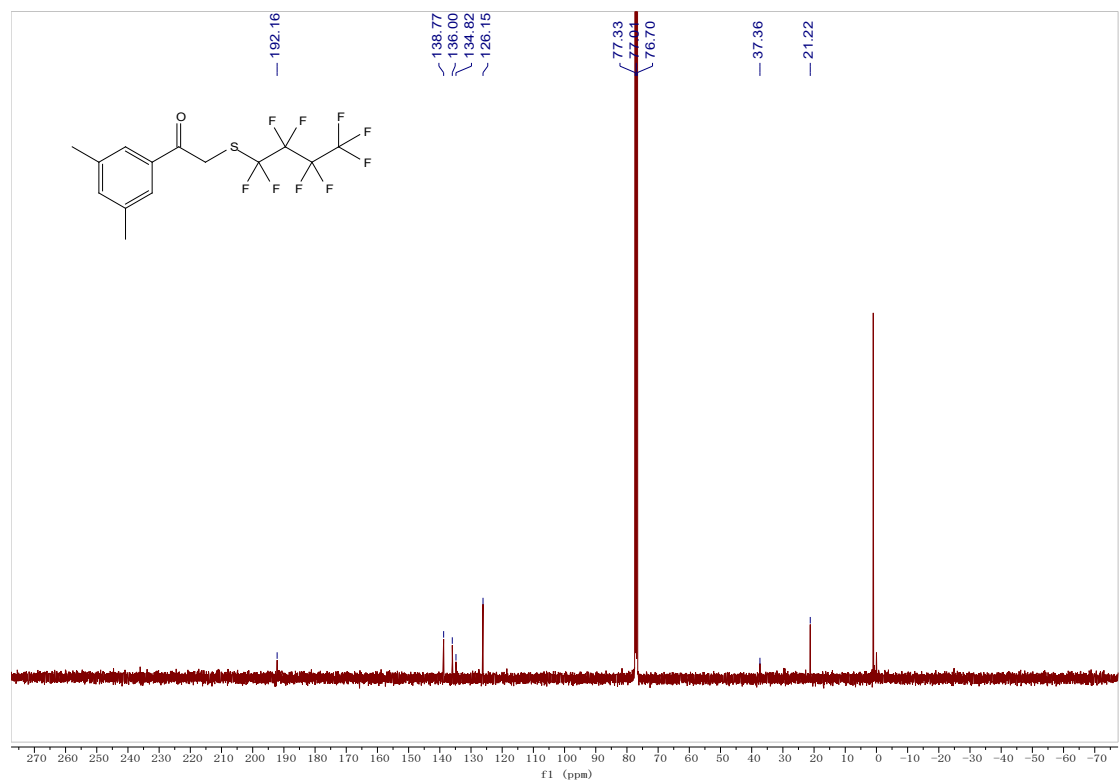

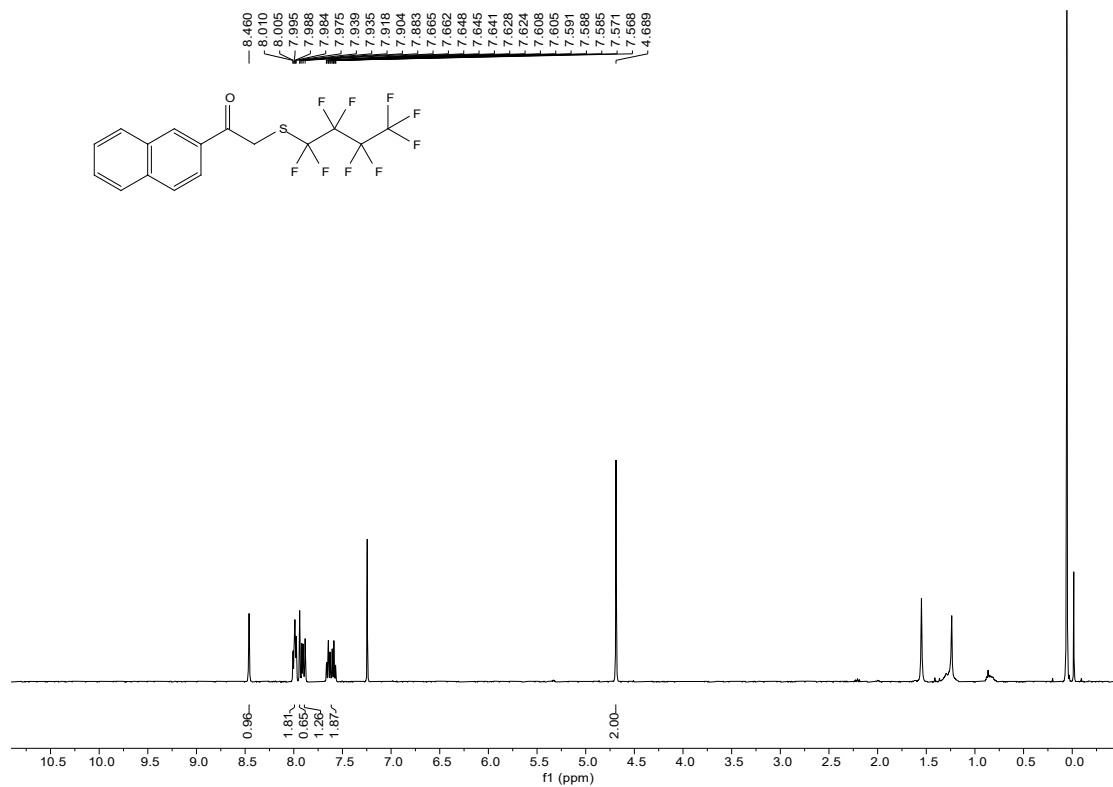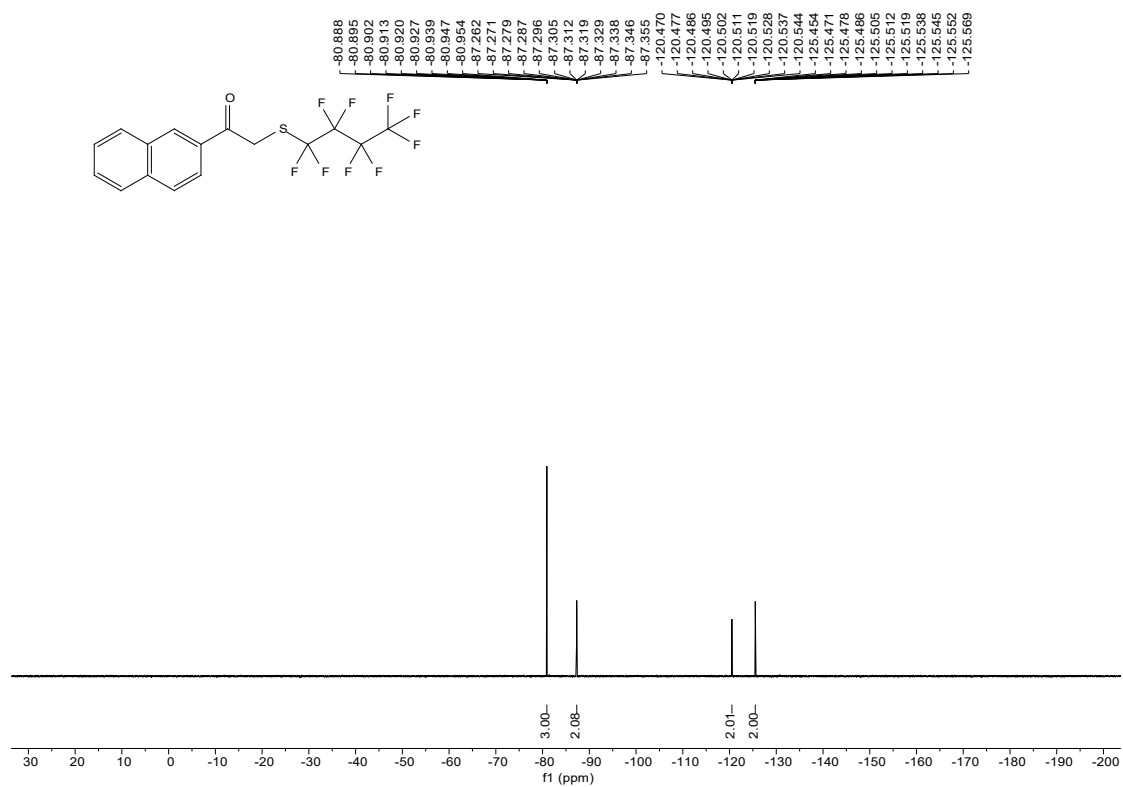

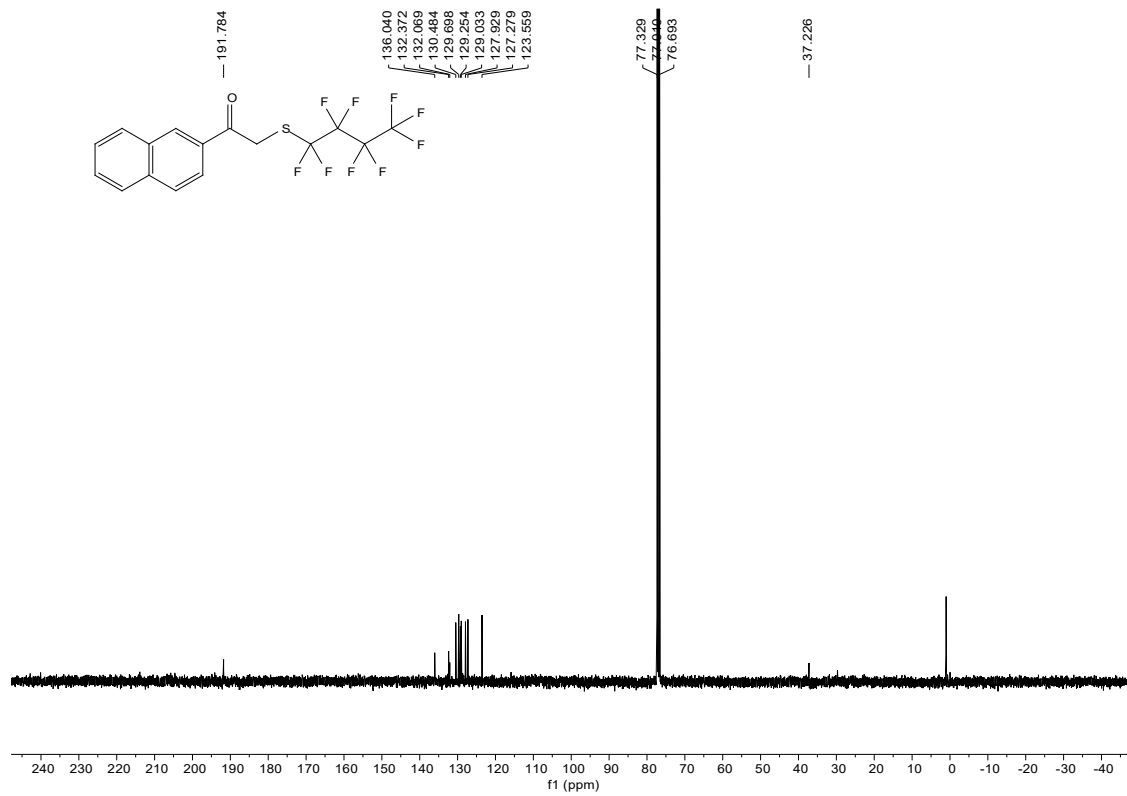

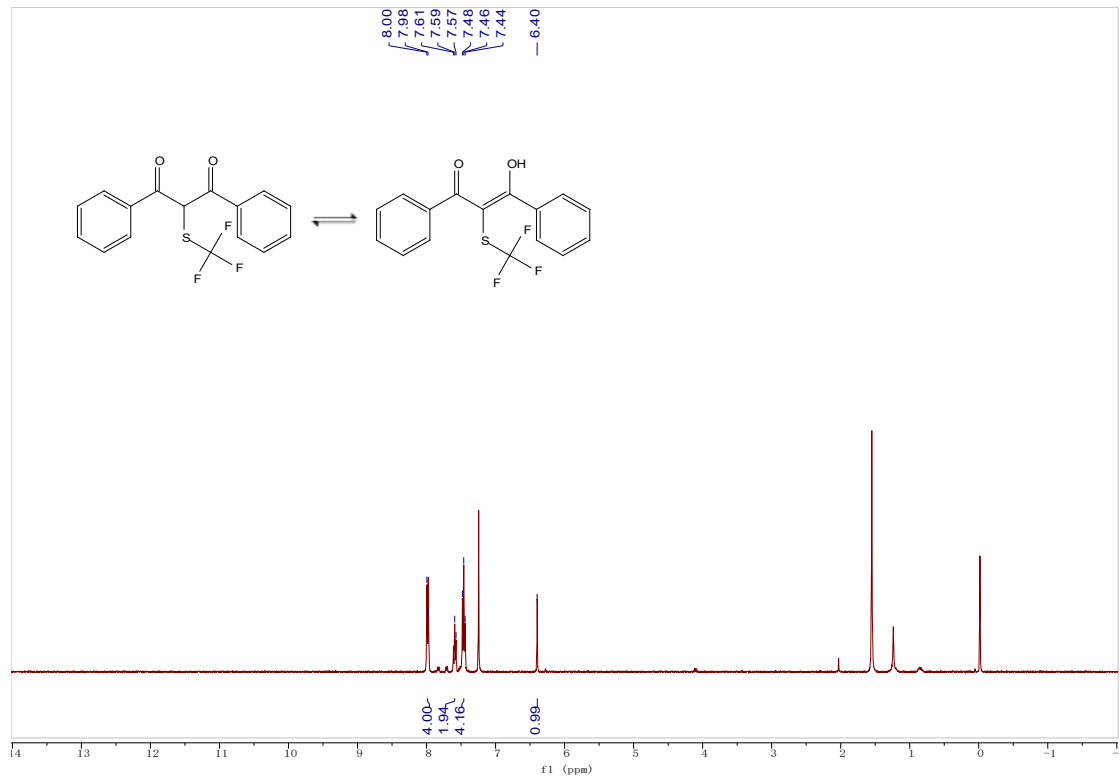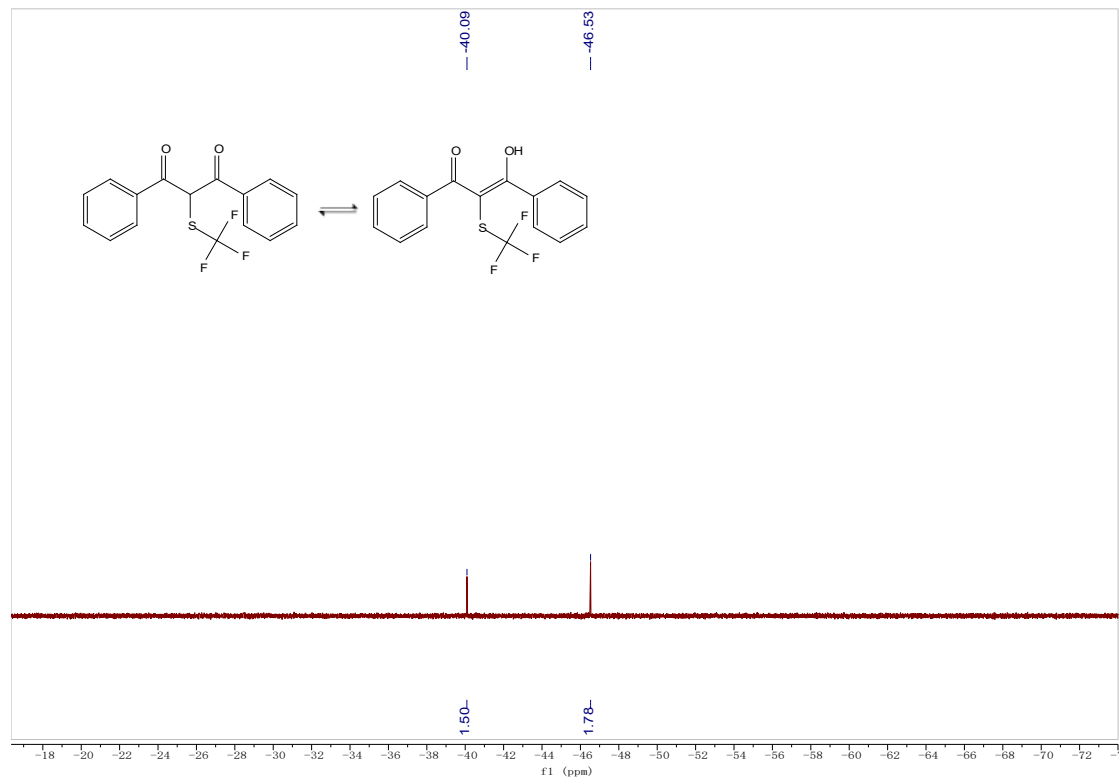

Supplement: d3ob01482g1.pdf [file d3ob01482g1.pdf]
